# Supplementary material for: Preliminary Insight of Pyrrolylated-Chalcones as New Anti-Methicillin-Resistant Staphylococcus aureus (Anti-MRSA) Agents
Source: MDPI journal article supplement (doi:10.3390/molecules26175314), 2021-09-01
Supplement: s1 [file s1]

## **SUPPLEMENTARY MATERIALS**

# **Preliminary insight of pyrrolylated-chalcones as new anti-methicillin-resistant *Staphylococcus aureus* (anti-MRSA) agents**

**Mohanapriya Gunasekharan<sup>1,a</sup>, Tae-Ik Choi<sup>2,a</sup>, Yaya Rukayadi<sup>3,4</sup>, Muhammad Alif Mohammad Latif<sup>5</sup>, Thiruvethan Karunakaran<sup>6</sup>, Siti Munirah Mohd Faudzi<sup>1,3,\*</sup>, Cheol-Hee Kim<sup>2,\*</sup>**

1 Department of Chemistry, Faculty of Science, Universiti Putra Malaysia, 43400 UPM, Serdang, Selangor, Malaysia.

2 Department of Biology, Chungnam National University, 99 Daehak-ro, Yuseong-gu, Daejeon 34134, Korea

3 Natural Medicines and Product Research Laboratory, Institute of Bioscience, Universiti Putra Malaysia, Serdang, 43400, Selangor, Malaysia

4 Department of Food Science, Faculty of Food Science and Technology, Universiti Putra Malaysia, 43400 UPM, Serdang, Selangor, Malaysia.

5 Centre of Foundation Studies for Agricultural Science, Universiti Putra Malaysia, Serdang, 43400, Selangor, Malaysia.

6 Centre for Drug Research, Universiti Sains Malaysia, 11800 USM, Pulau Pinang, Malaysia.

a These authors contributed equally

\* Correspondence: sitimunirah@upm.edu.my (S.M.M.F); zebrakim@cnu.ac.kr (C.H.K.)

## **1. Synthesis**

### ***General procedure for the synthesis of 1-4 and 6-15***

In a round-bottomed flask, 2 mmol of 2-acetylpyrrole and 2 mmol of substituted benzaldehydes were dissolved in 5 mL of ethanol, prior the dropwise addition of 1 mL of 6 M NaOH after the resulting mixture was stirred for 5 minutes. The reaction mixture was then left to stir overnight at room temperature. The progress of the reaction was monitored through the TLC spotting. Once the reaction is completed, the crushed ice was added to quench the reaction. Following that, the diluted 1 M HCl was added until the reaction mixture reaches pH 7, before further extracted with ethyl acetate (3 × 10 mL). The organic layer was collected, dried over with anhydrous MgSO<sub>4</sub> and evaporated under reduced pressure. The crude products (**1-15**) were purified by column chromatography and/or recrystallization technique to yield the pure compounds. The spectroscopic results for new chalconoids (**5**, **11-15**) including the 1D (<sup>1</sup>H-, <sup>13</sup>C-, and <sup>19</sup>F-NMR) and 2D NMR (HSQC and HMBC), as well as FT-IR, DI-MS and HR-MS were listed in the following sub-section. Meanwhile, the general and spectrometry data, as well as the predicted physicochemical and drug likeness properties of the synthesized molecules **1-15** were tabulated in Table S1 and S2, respectively.

### ***Procedure for the synthesis of 5***

10 mL of 6 M NaOH were dissolved in 6 mL water and cooled at 0° C in the ice bath, prior the slowly-addition of 10 mL ethanol into the diluted NaOH solution. The reaction flask was then removed from the ice bath and was set at room temperature. Following that, an equimolar quantity of 2-acetylpyrrole and 2-nitrobenzaldehyde were added slowly to the mixture. The reaction mixture was stirred for 2 hr at room temperature prior cooled at 0° C for 24 hrs. The precipitates formed were filtered, washed with cold water, and recrystallized with ethanol. The crystals obtained were dried at 70° C and kept in room temperature.

**Structural characterization of new compounds 5 and 11-15**

*3-(2-Nitrophenyl)-1-(1H-pyrrol-2-yl) prop-2-en-1-one (5)*

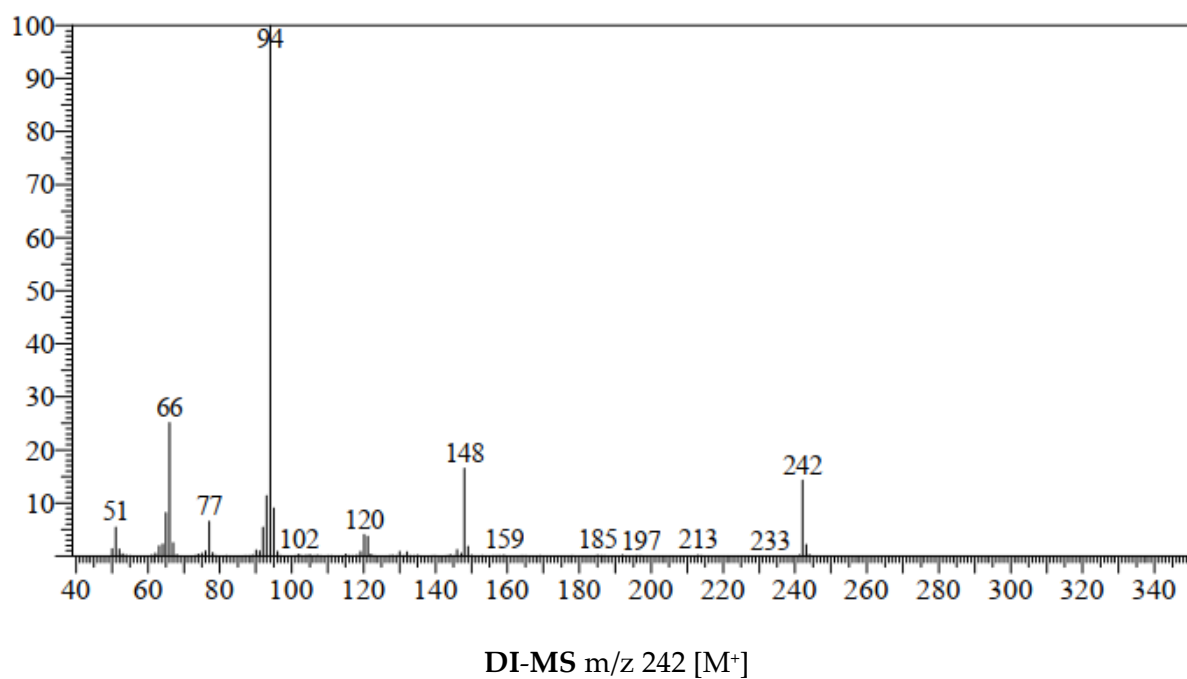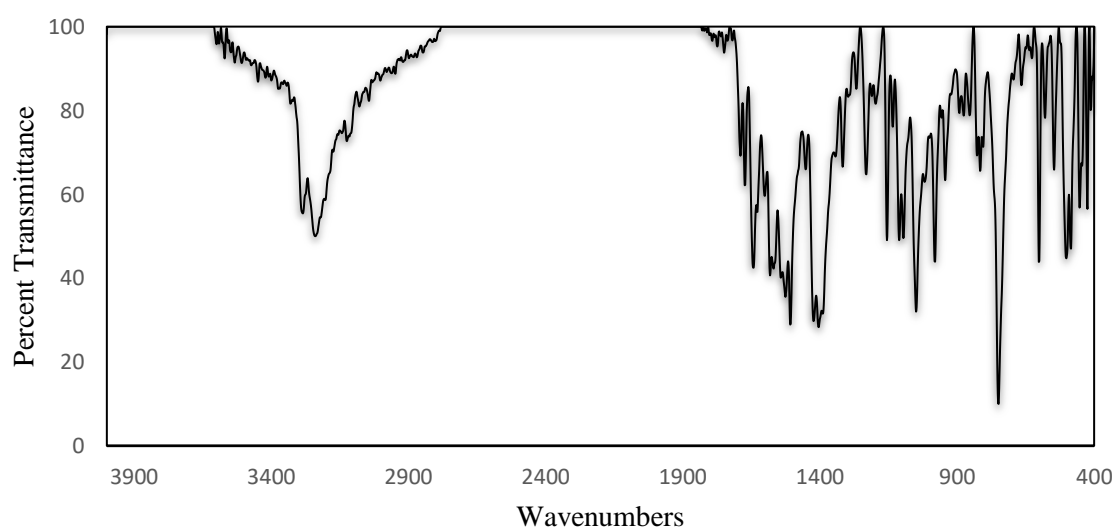

**FT-IR**

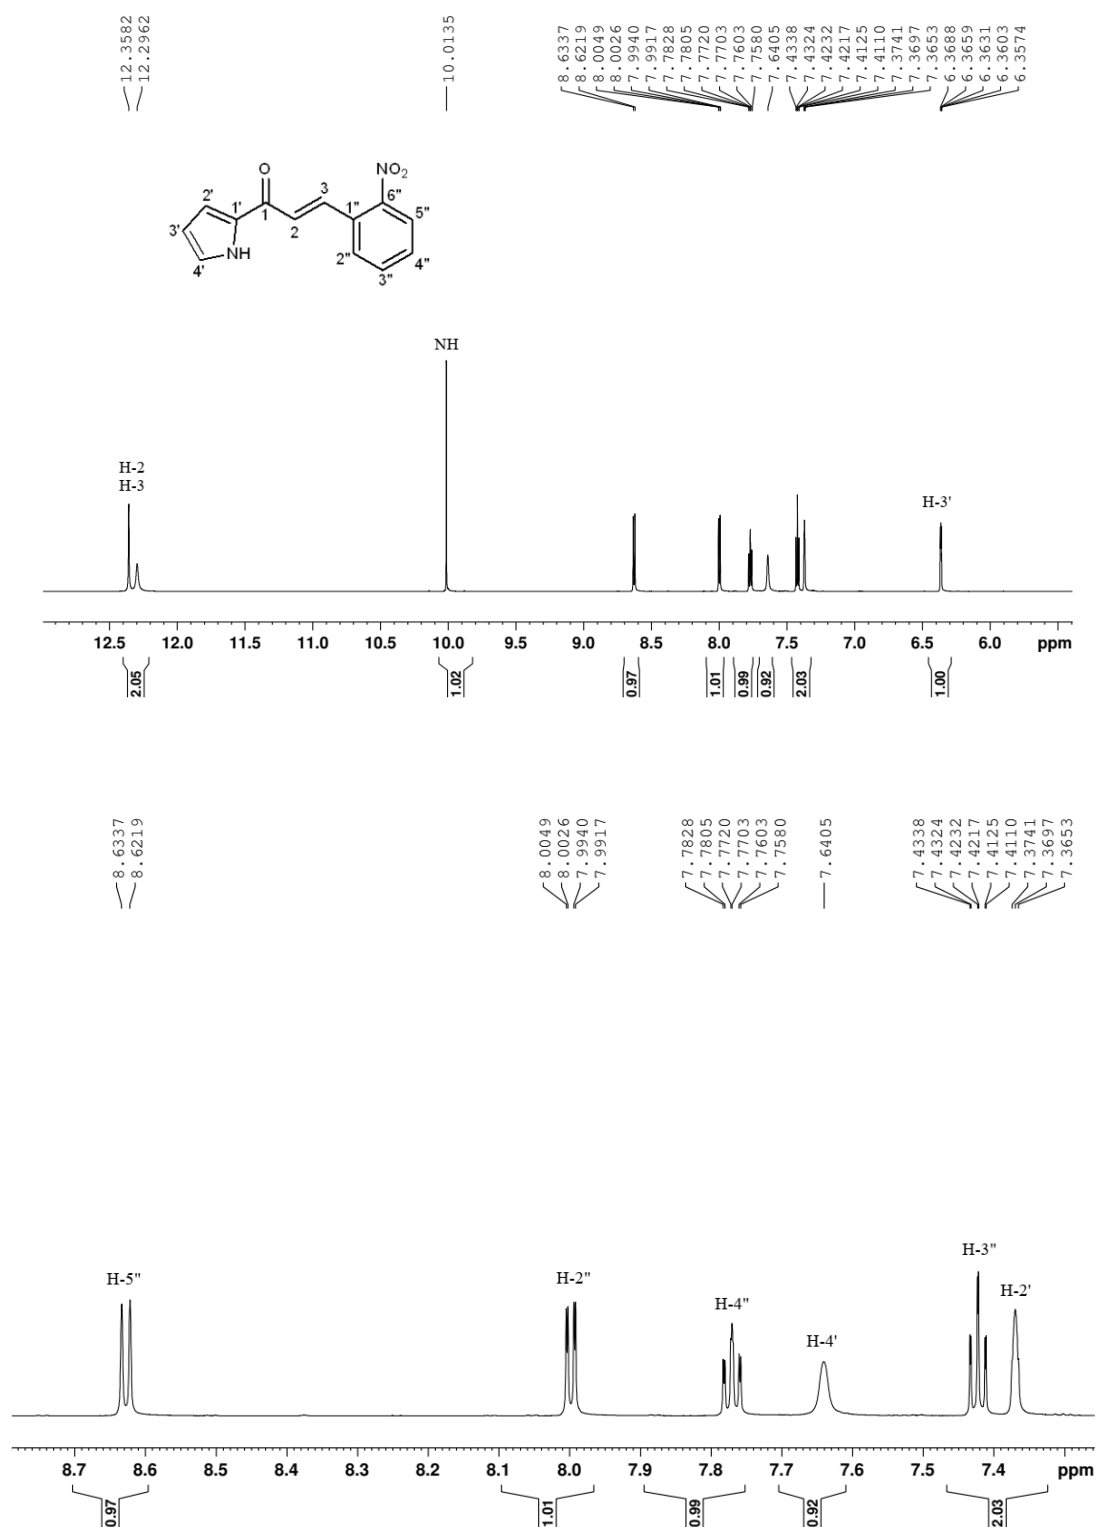

**<sup>1</sup>H-NMR (expansion)**

**<sup>1</sup>H-NMR** (700 MHz, DMSO-d<sub>6</sub>) δ: 6.37 (*m*, 1H, Py-H), 7.37 (*t*, *J*=3.1 Hz, 1H, Py-H), 7.42 (*td*, *J*=1.1 & 7.4 Hz, 1H, Ar-H), 7.64 (*s*, 1H, Py-H), 7.77 (*td*, *J*=1.2 & 7.6 Hz, 1H, Ar-H), 8.00 (*dd*, *J*=1.6 & 7.6 Hz, 1H, Ar-H), 8.63 (*d*, *J*=8.3 Hz, 1H, Ar-H), 10.0 (*s*, 1H, NH), 12.30 (*br. s*, 2H, CH=CH);

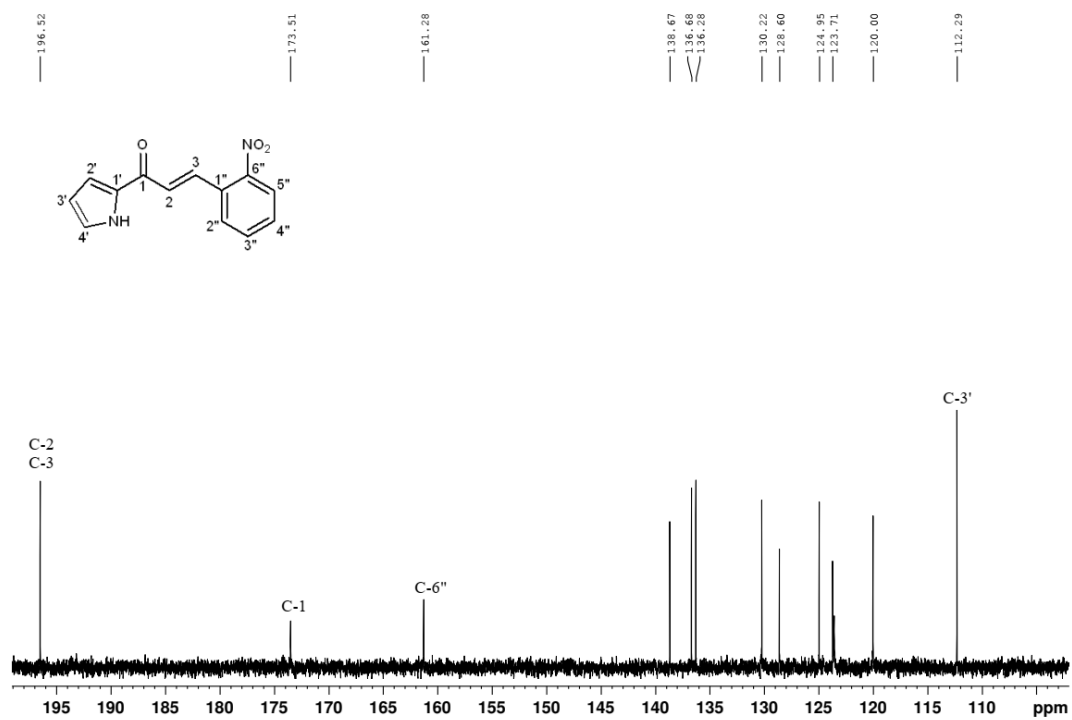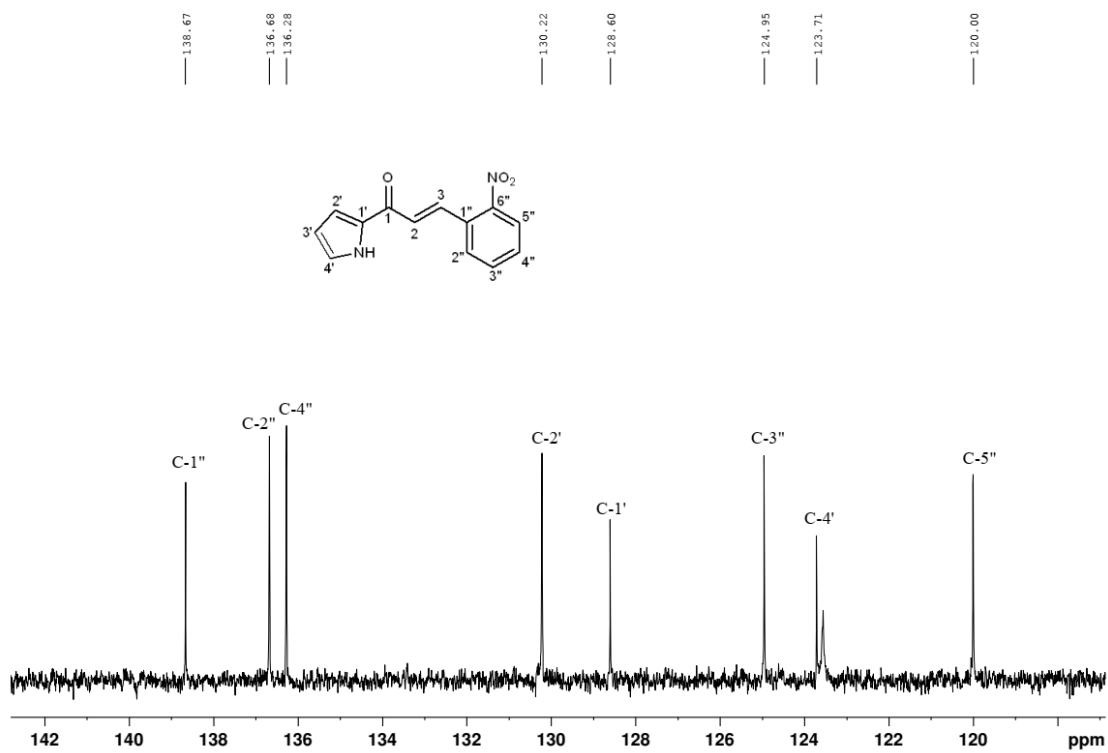

<sup>13</sup>C-NMR (expansion)

$^{13}\text{C}$ -NMR (175 MHz, DMSO- $d_6$ )  $\delta$ : 112.2, 120.0, 123.7, 124.9, 128.6, 130.2, 136.2, 136.6, 138.6, 161.2, 173.5, 196.5

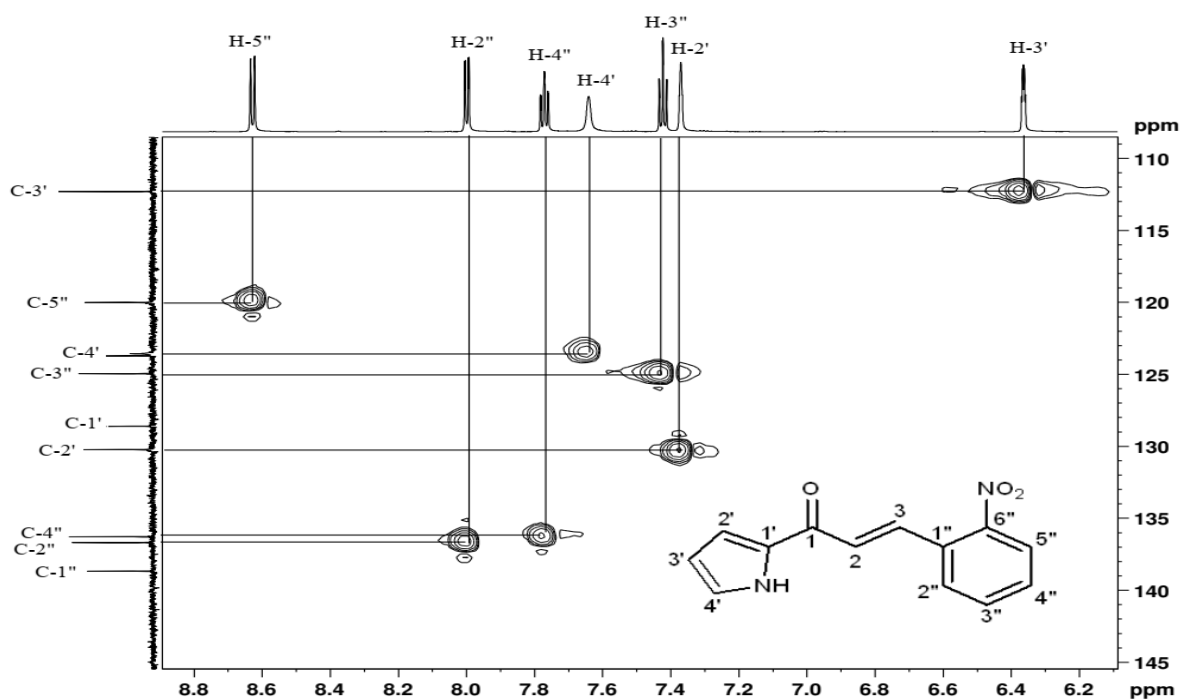

HSQC

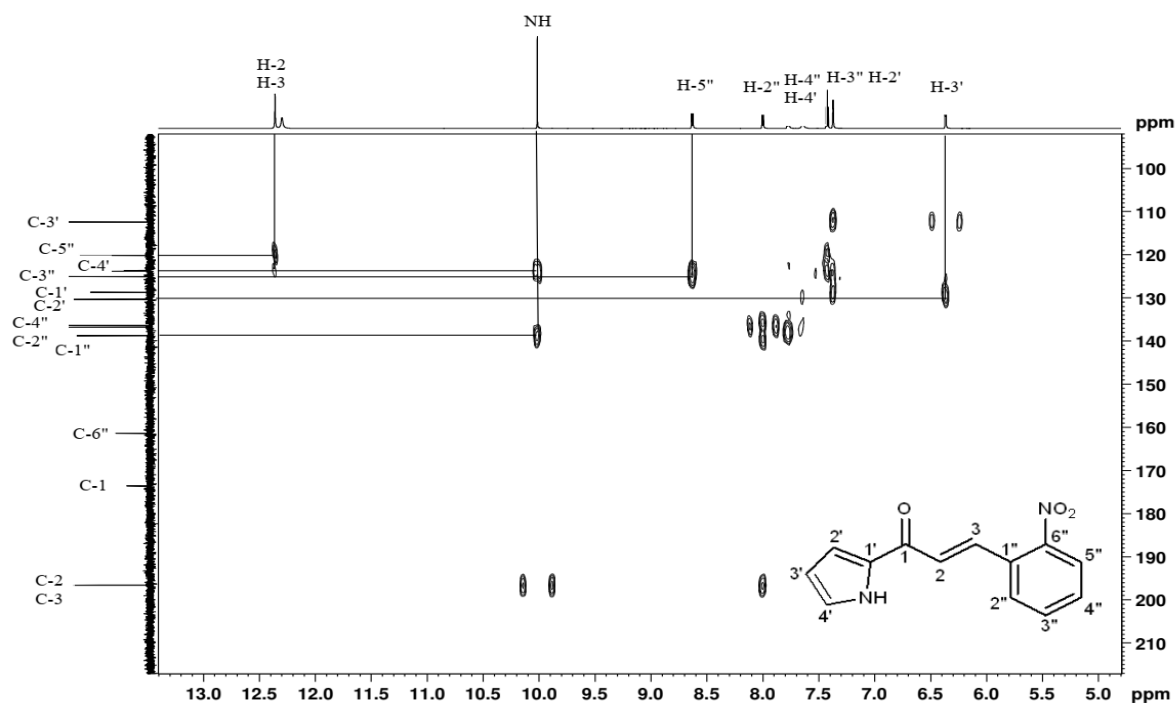

HMBC

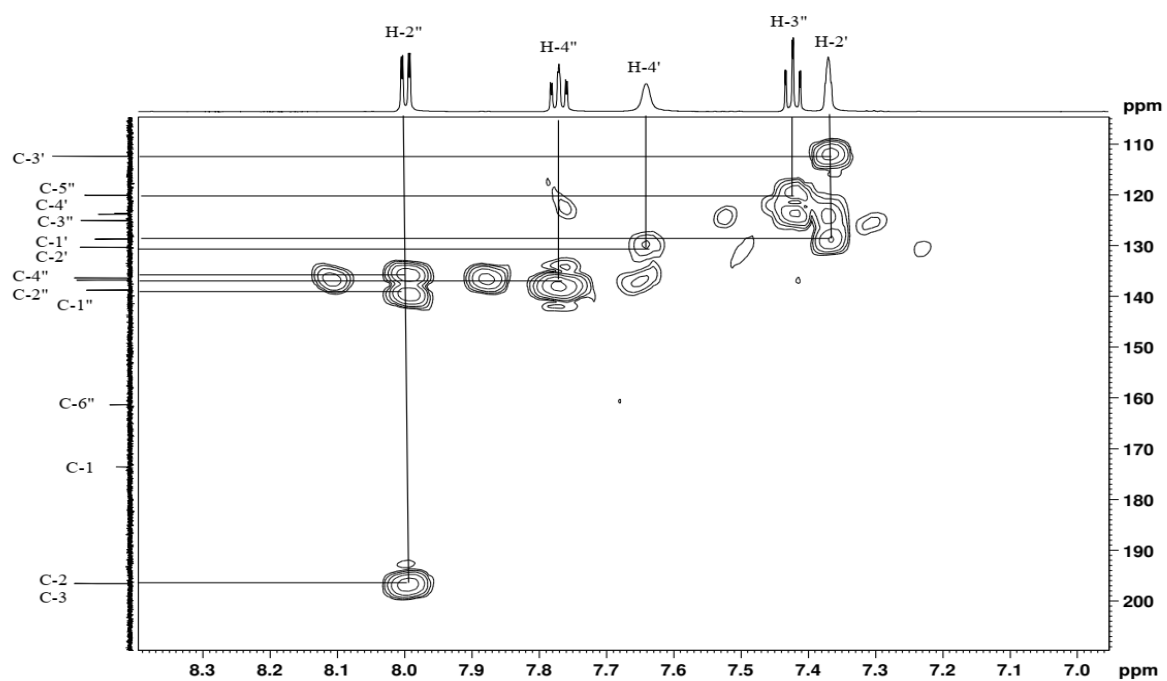

HMBC (expansion)

*3-(2, 3-Difluorophenyl)-1-(1H-pyrrol-2-yl) prop-2-en-1-one (11)*

Direct\_PC11\_FullMS\_Neg\_20210421115409 #1 RT: 0.00 AV: 1 SM: 15G NL: 5.28E8  
T: FTMS - p ESI Full ms [50.0000-414.0000]

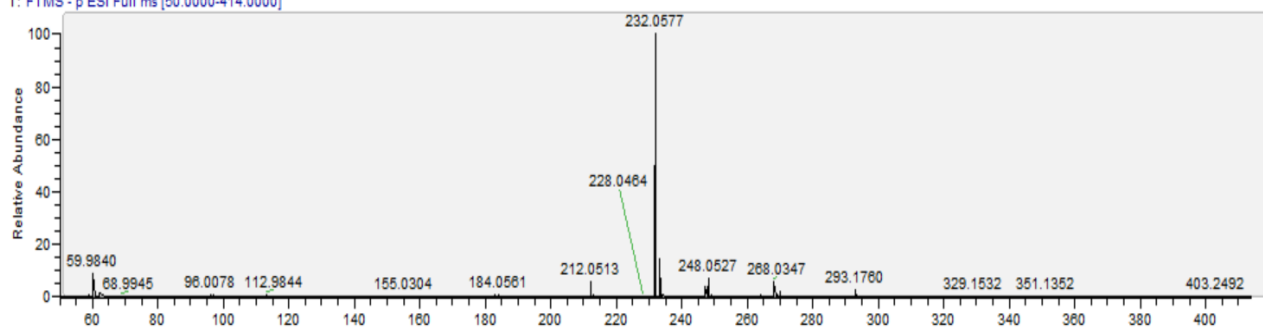

**HRMS (ESI) [M-H]<sup>-</sup> : found: 232.0577**

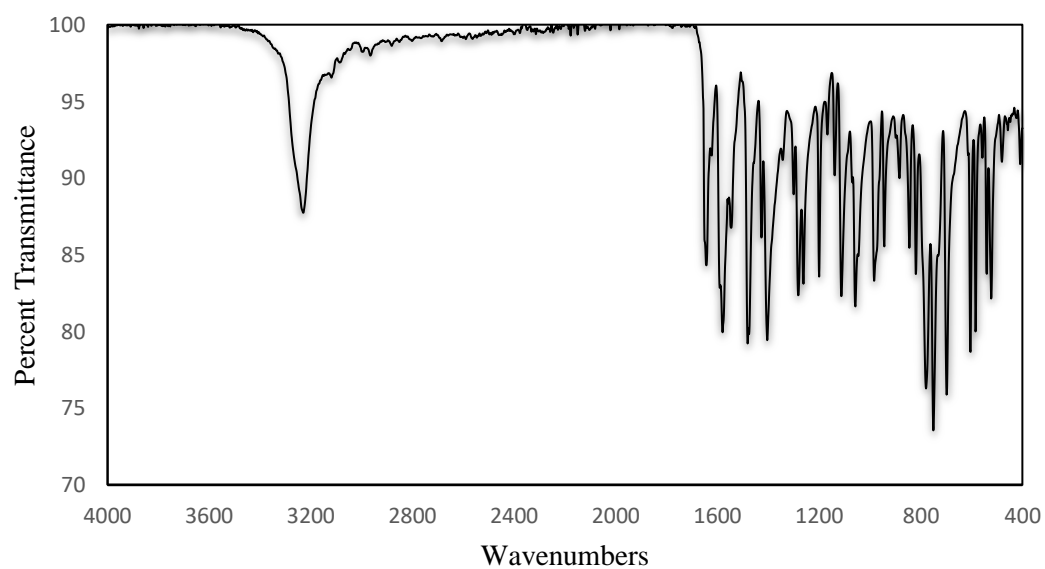

**FT-IR**

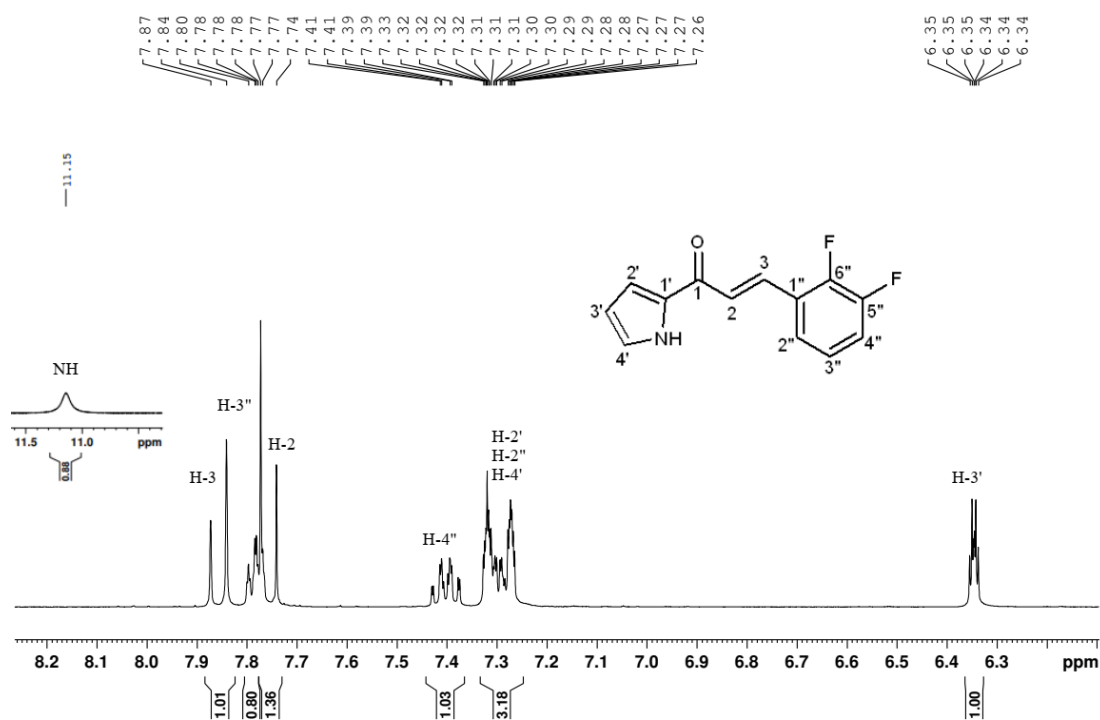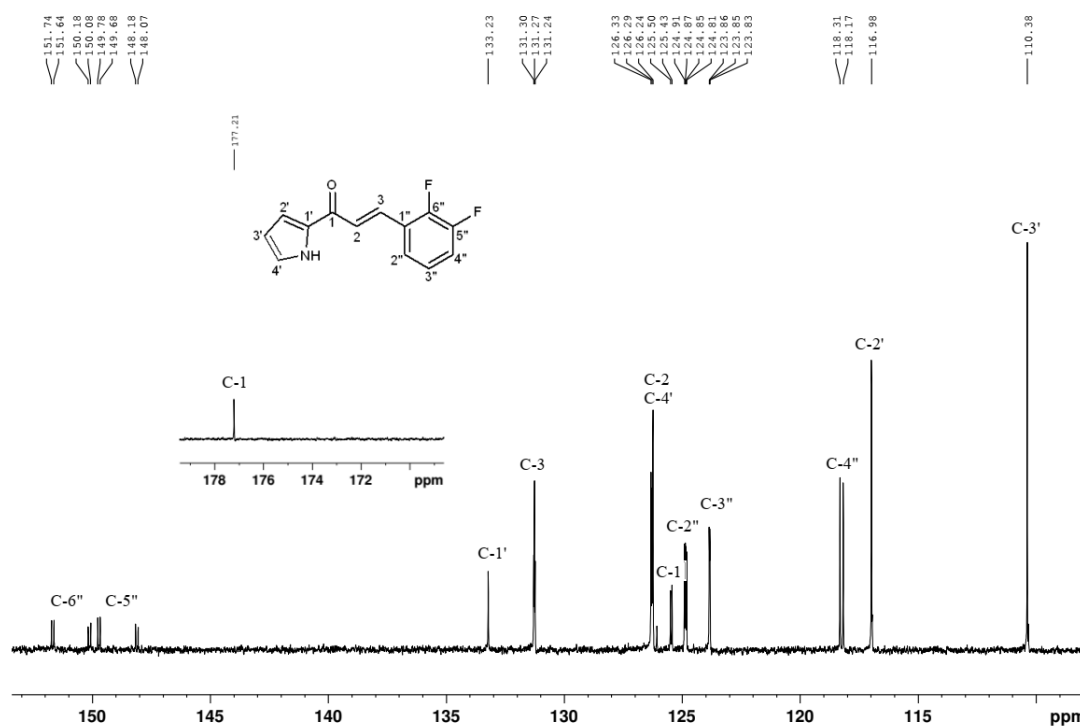



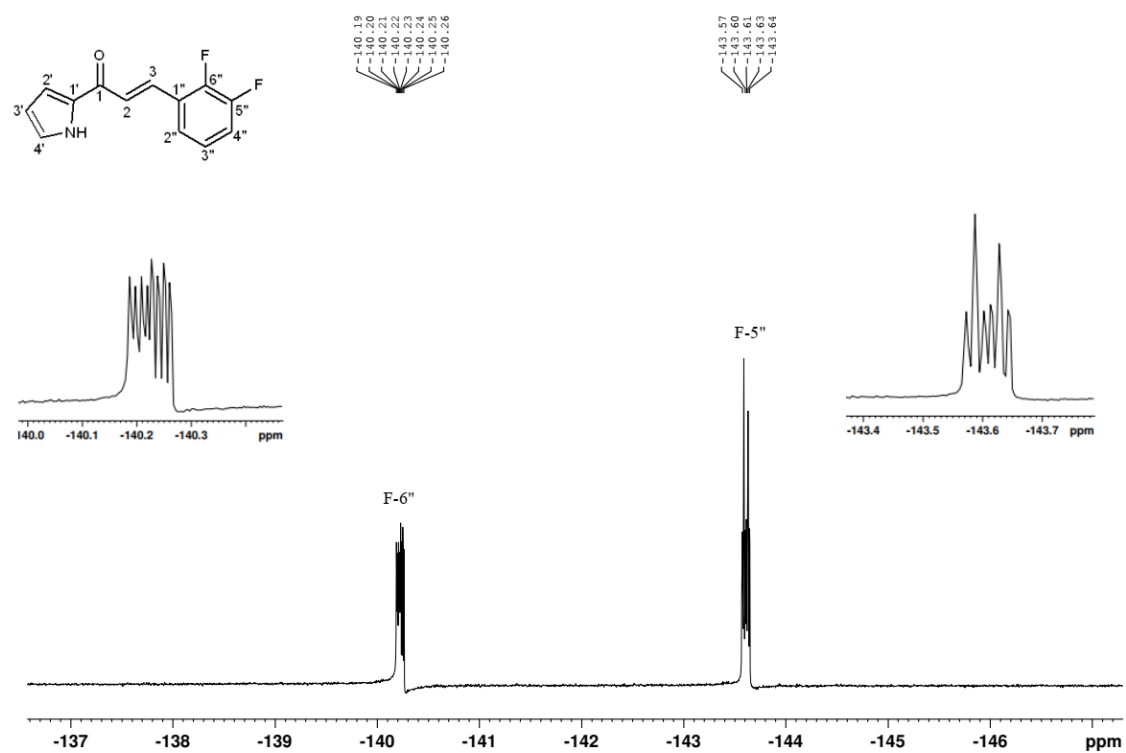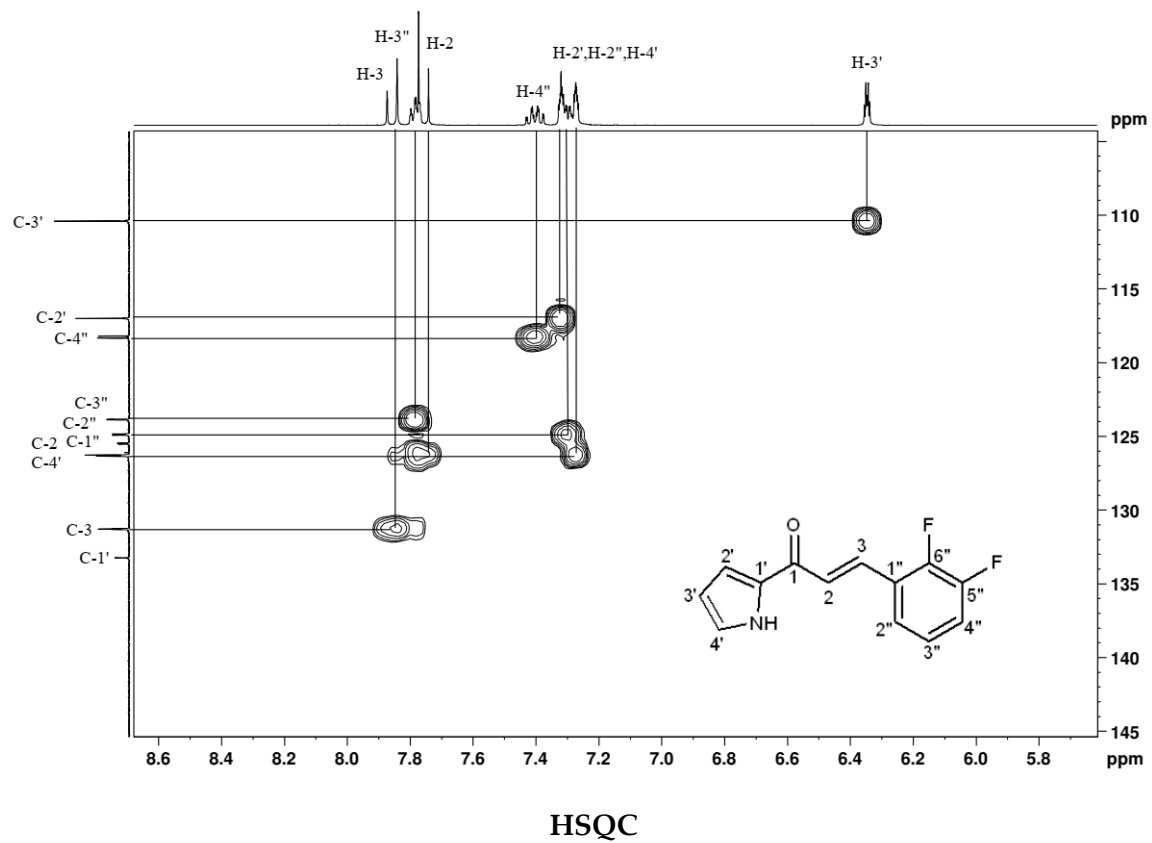

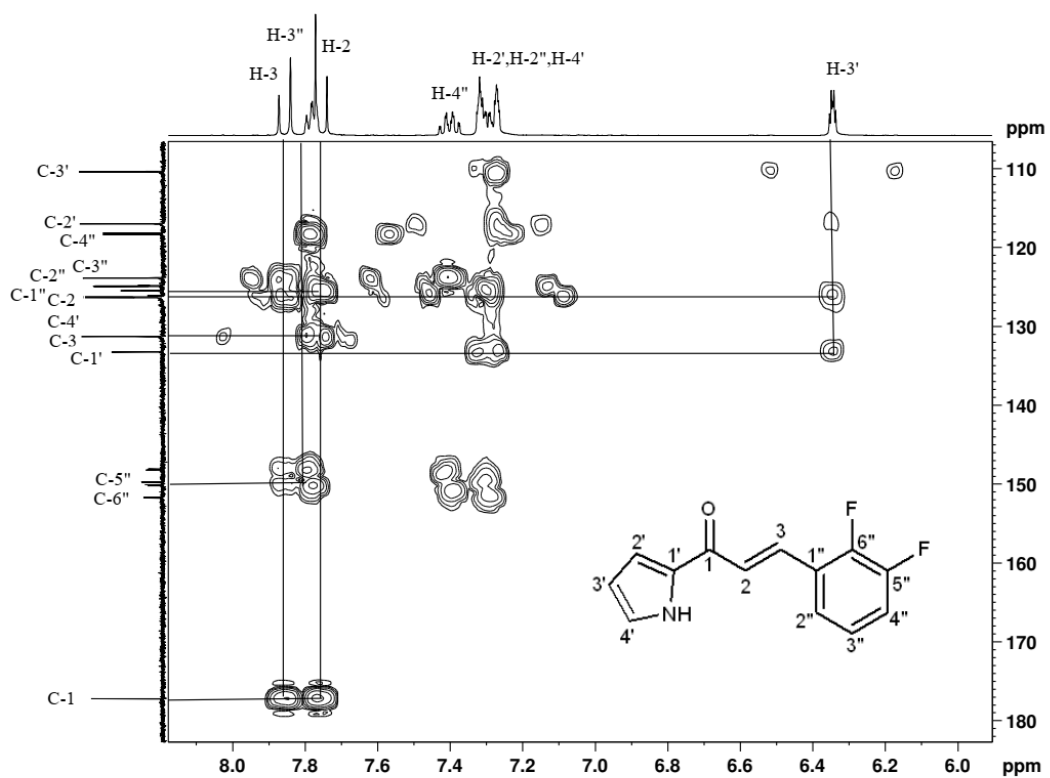

HMBC

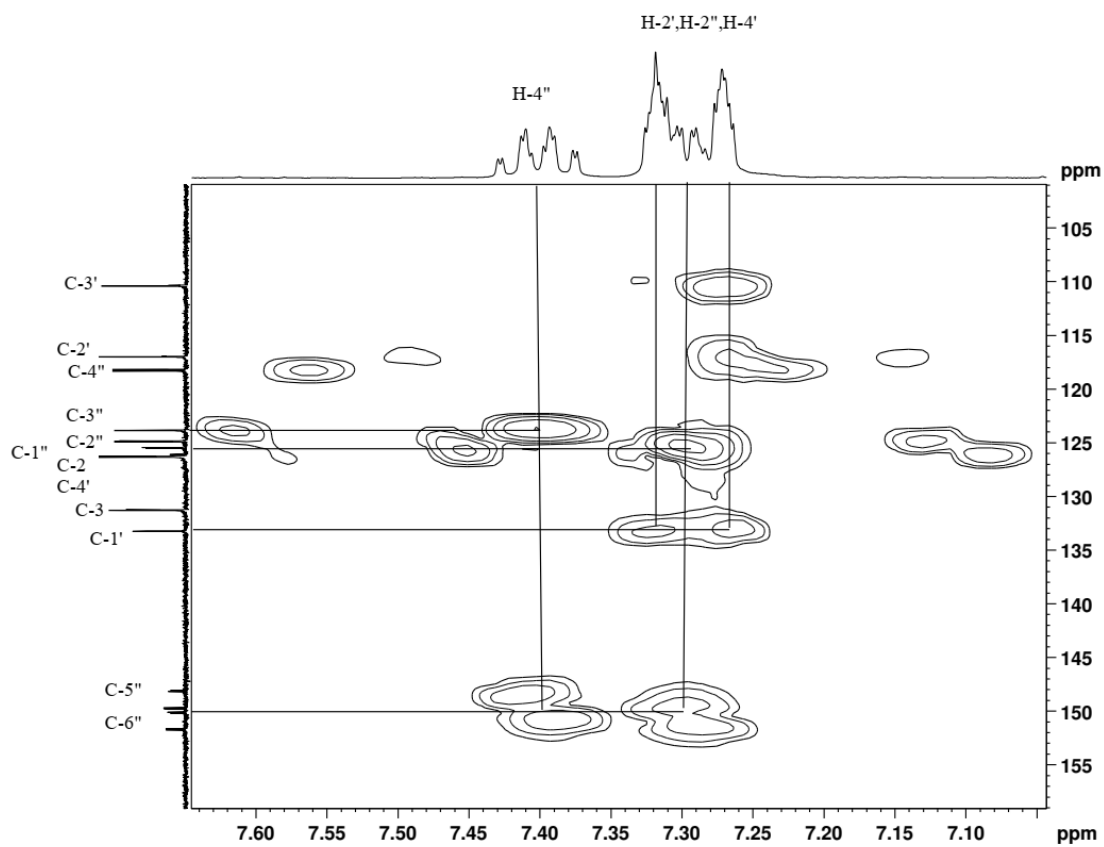

HMBC (expansion)

*3-(2, 4-Difluorophenyl)-1-(1H-pyrrol-2-yl) prop-2-en-1-one (12)*

Direct\_PC12\_FullMS\_Neg #1 RT: 0.00 AV: 1 SM: 15G NL: 5.68E5  
T: FTMS - p ESI Full ms [133.4000-400.0000]

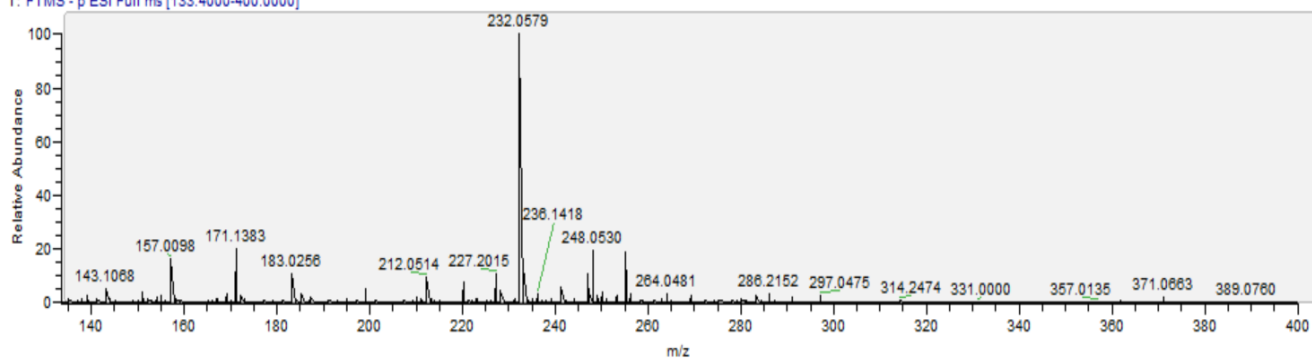

HRMS (ESI) [M-H]<sup>-</sup> : found: 232.0579

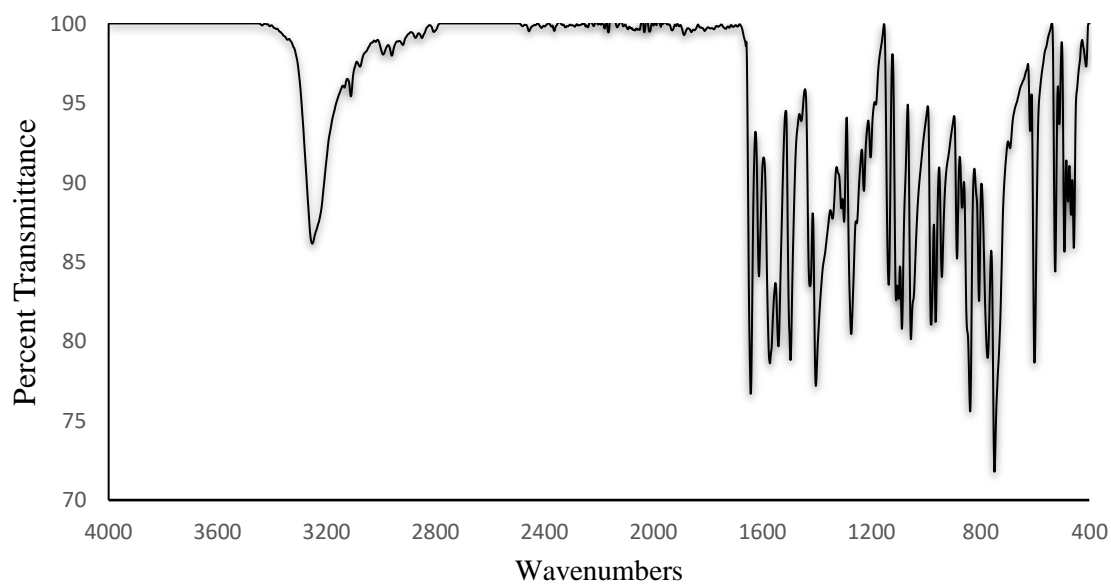

FT-IR

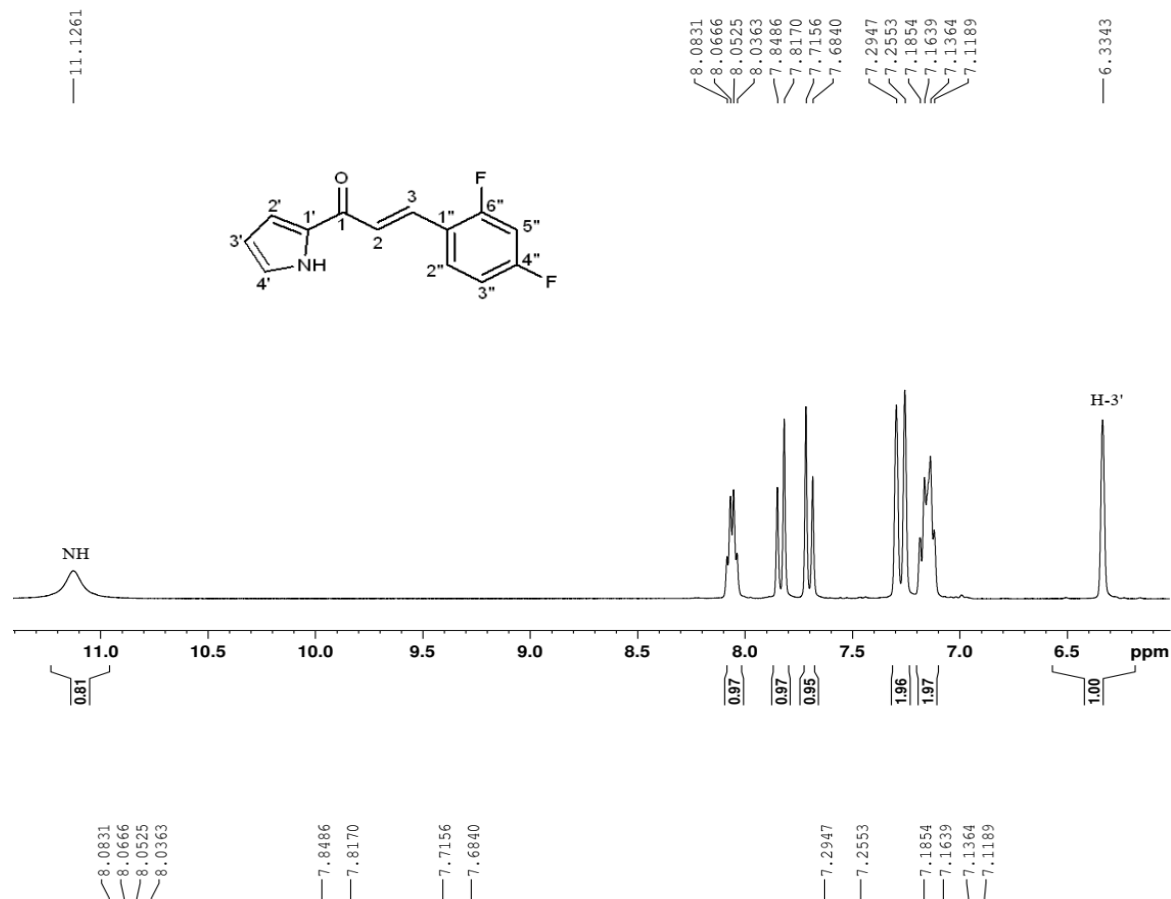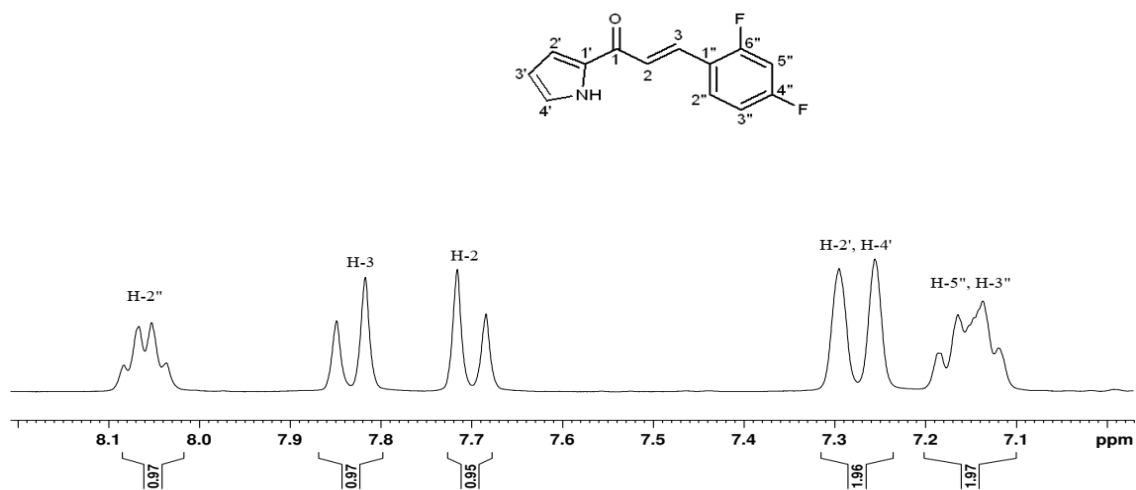

### $^1\text{H}$ NMR (expansion)

$^1\text{H}$  NMR (500 MHz, acetone- $d_6$ )  $\delta$  : 6.33 (br. s, 1H, Py-H), 7.15 (m, 2H, Ar-H), 7.26 (br. s, 1H, Py-H), 7.29 (br. s, 1H, Py-H), 7.70 (d,  $J=15.8$ , 1H, CH=CH), 7.83 (d,  $J=15.8$ , 1H, CH=CH), 8.06 (dd,  $J=7.1$  & 8.3 Hz 1H, Ar-H), 11.13 (br. s, 1H, NH)

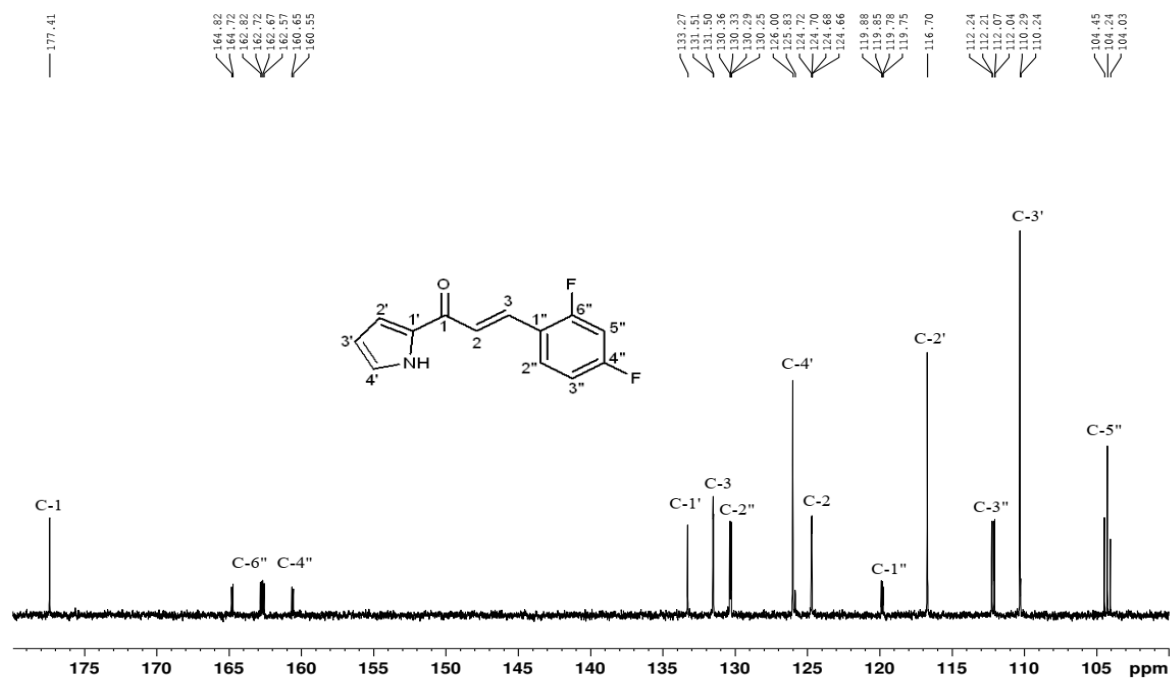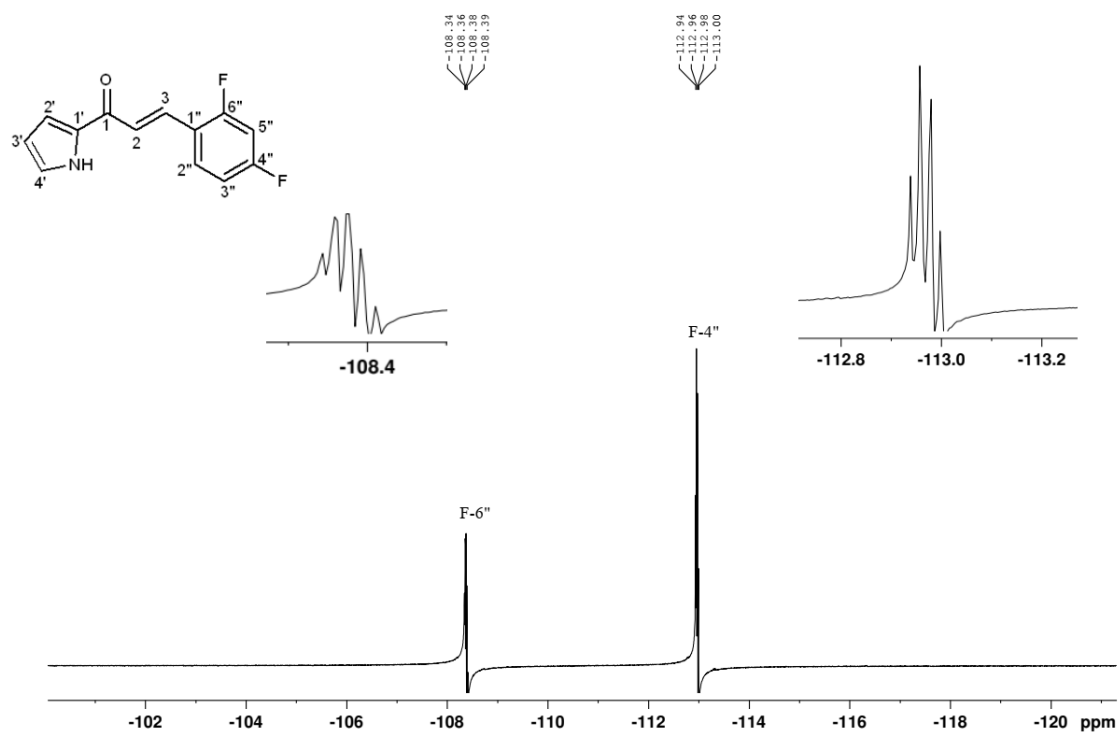

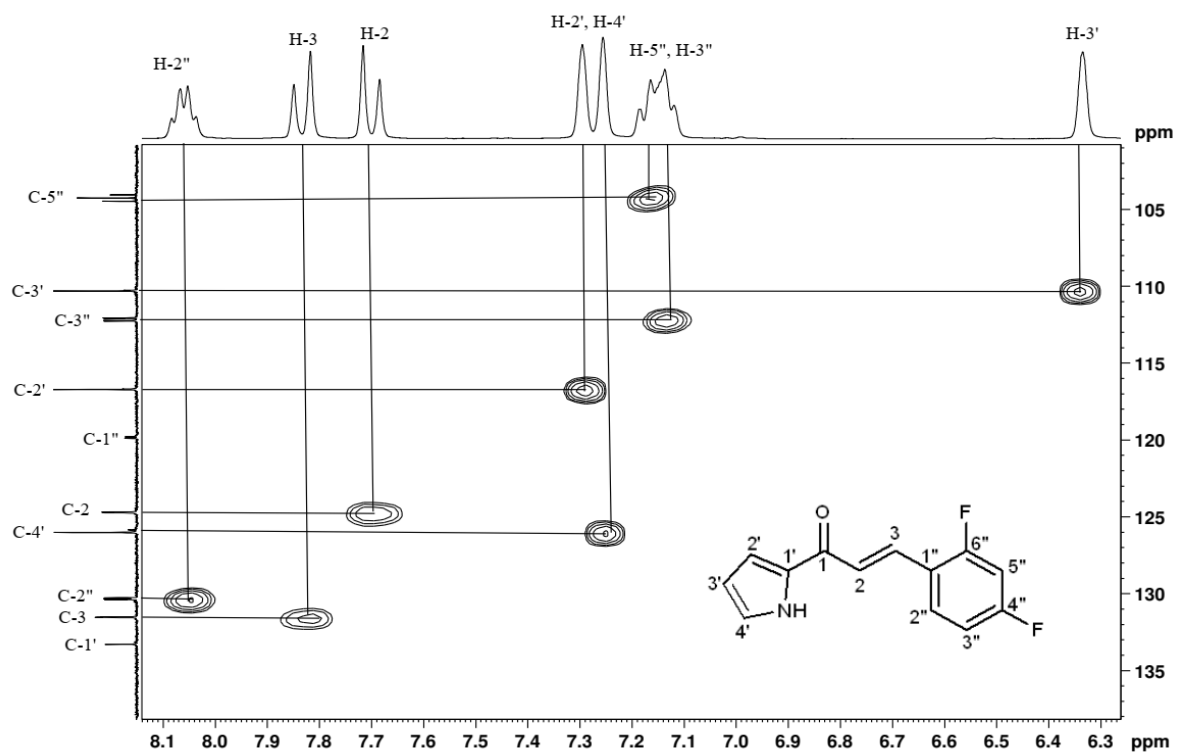

HSQC

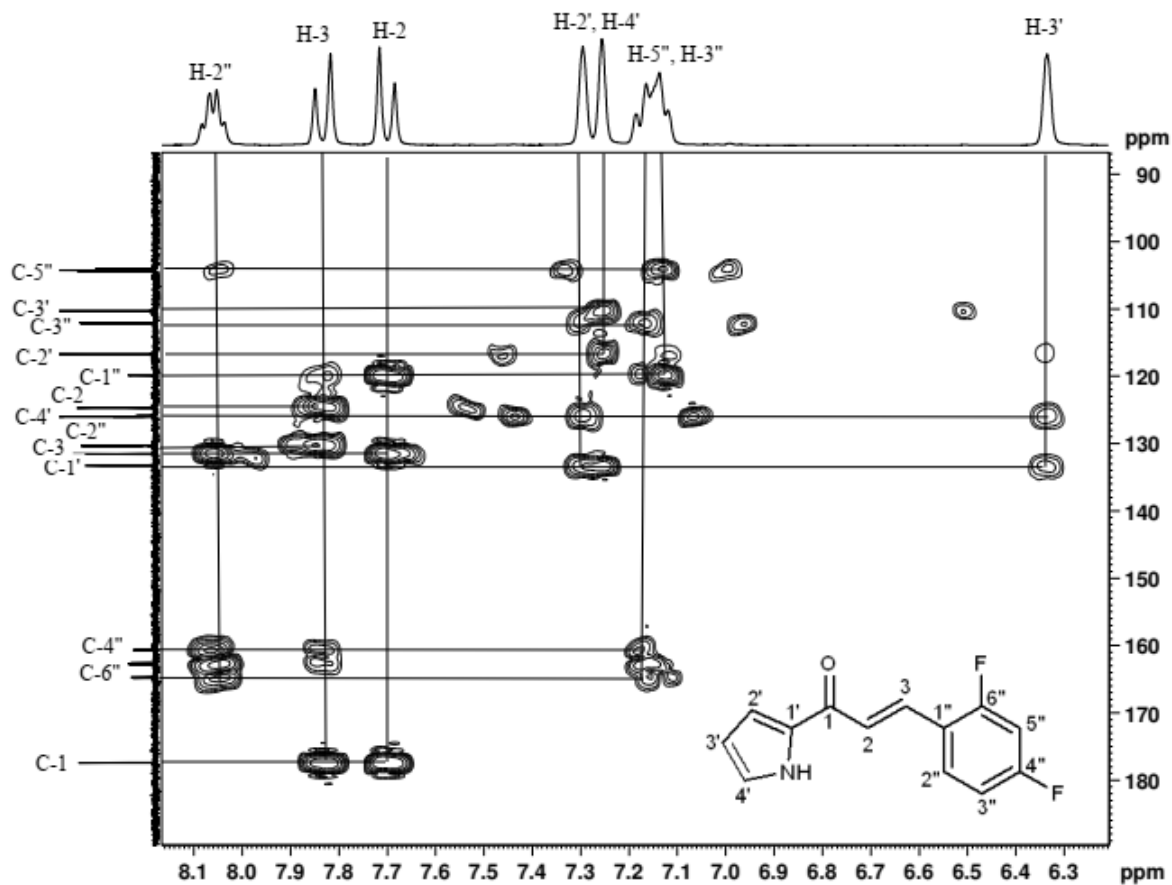

HMBC

*3-(2, 5-Difluorophenyl)-1-(1H-pyrrol-2-yl) prop-2-en-1-one (13)*

Direct\_PC13\_FullIMS\_Neg #1 RT: 0.00 AV: 1 SM: 15G NL: 2.47E7  
T: FTMS - p ESI Full ms [133.4000-500.0000]

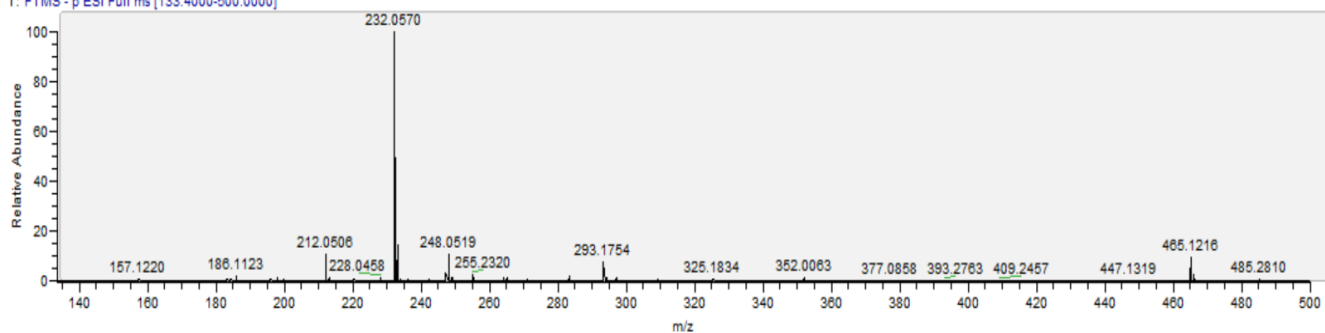

HRMS (ESI) [M-H]<sup>-</sup> : found: 232.0570

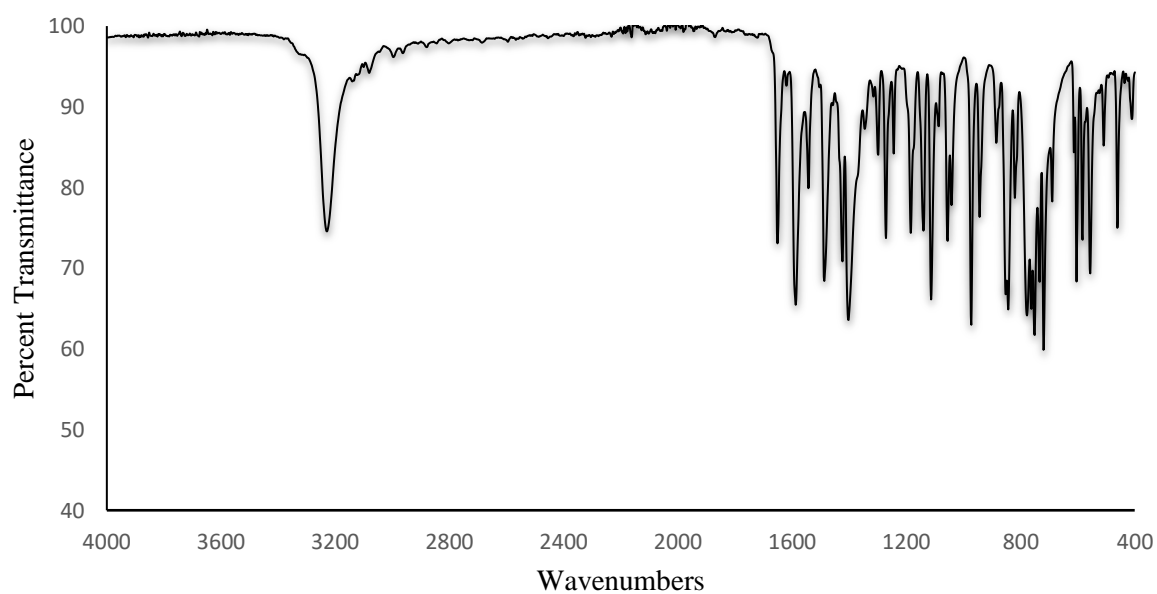

FT-IR

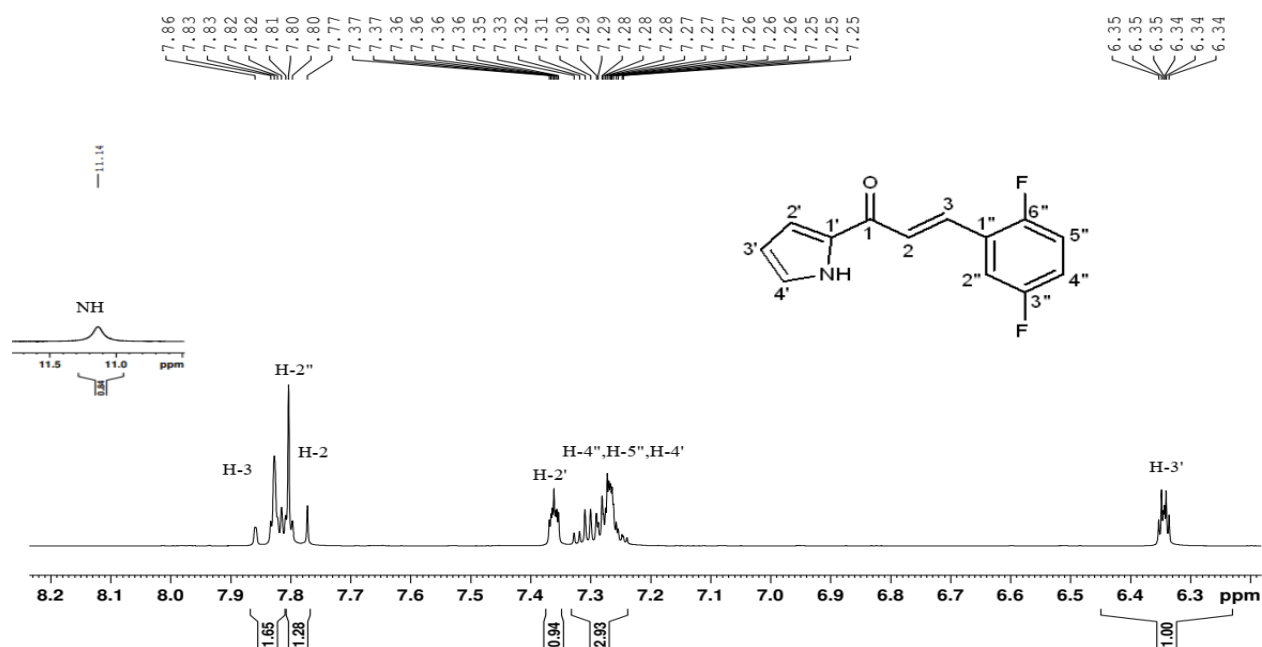

**<sup>1</sup>H NMR (500 MHz, acetone-d<sub>6</sub>)** δ : 6.34 (*m*, 1H, Py-H), 7.28 (*m*, 1H, Py-H), 7.31 (*dd*, *J*=4.7 & 9.2 Hz, 2H, Ar-H), 7.36 (*m*, 1H, Py-H), 7.78 (*d*, *J*=15.8, 1H, CH=CH), 7.81 (*m*, 1H, Py-H), 7.84 (*d*, *J*=16.1, 1H, CH=CH), 11.14 (*br. s*, 1H, NH)

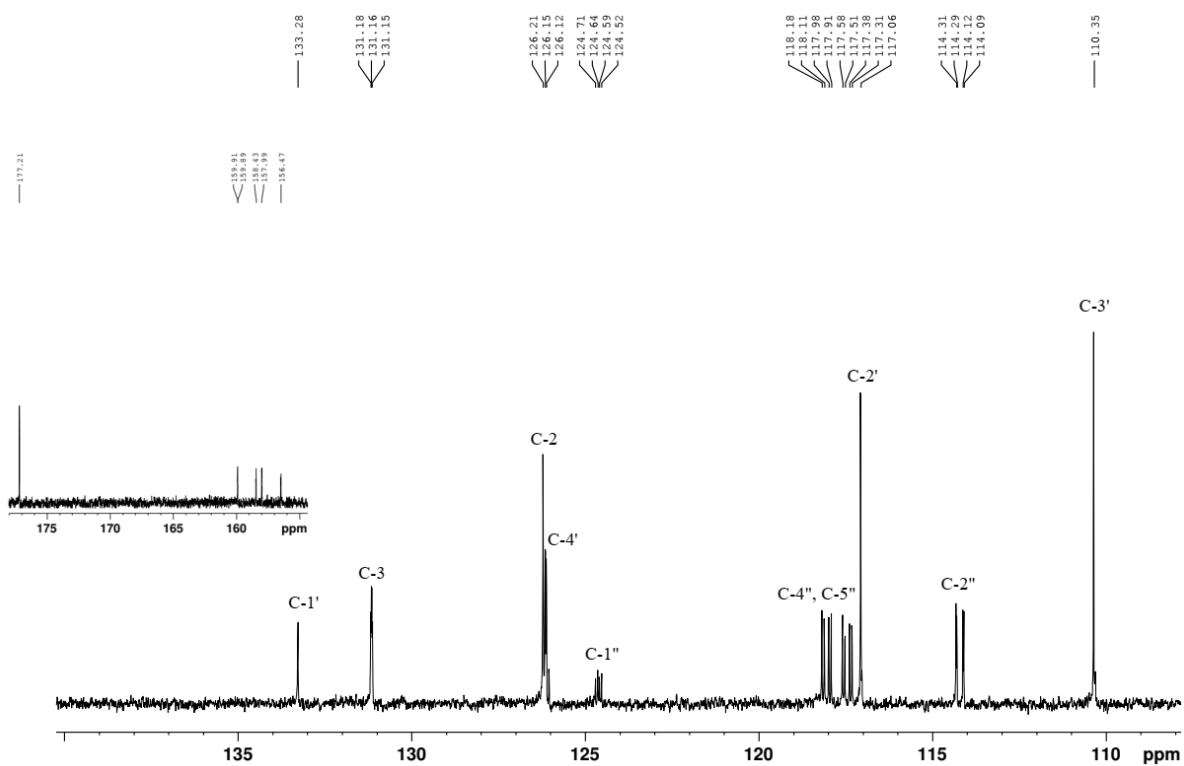

**<sup>13</sup>C NMR (125 MHz, acetone-d<sub>6</sub>)** δ: 110.3, 114.2, 117.0, 117.5, 118.1, 124.6, 126.1, 126.2, 131.1, 133.2, 157.2, 159.2, 177.2



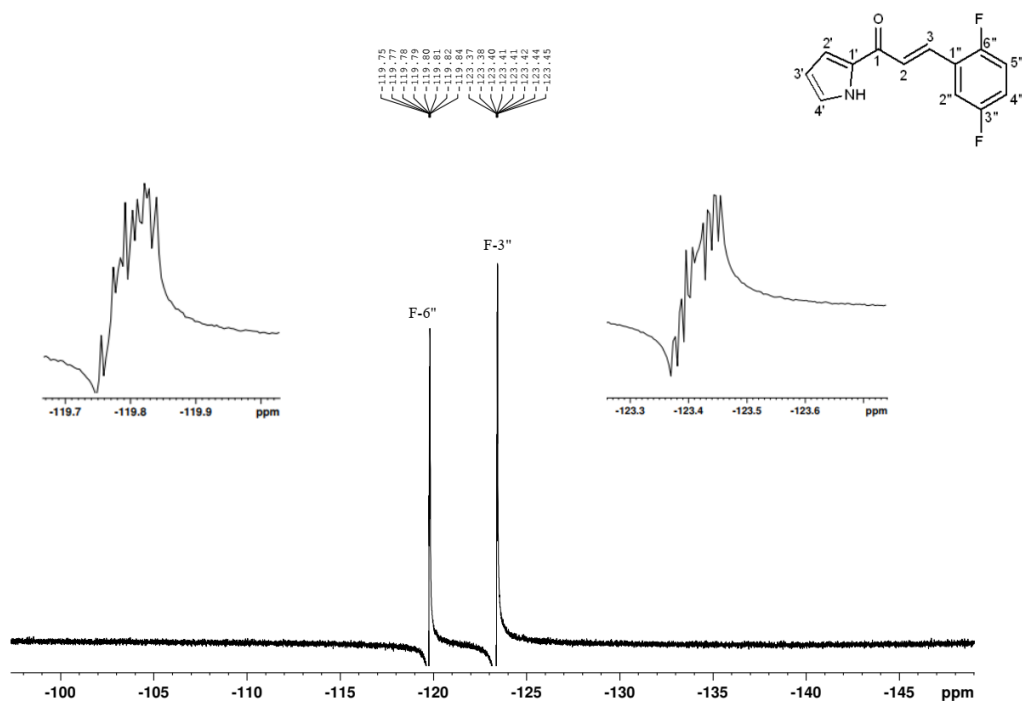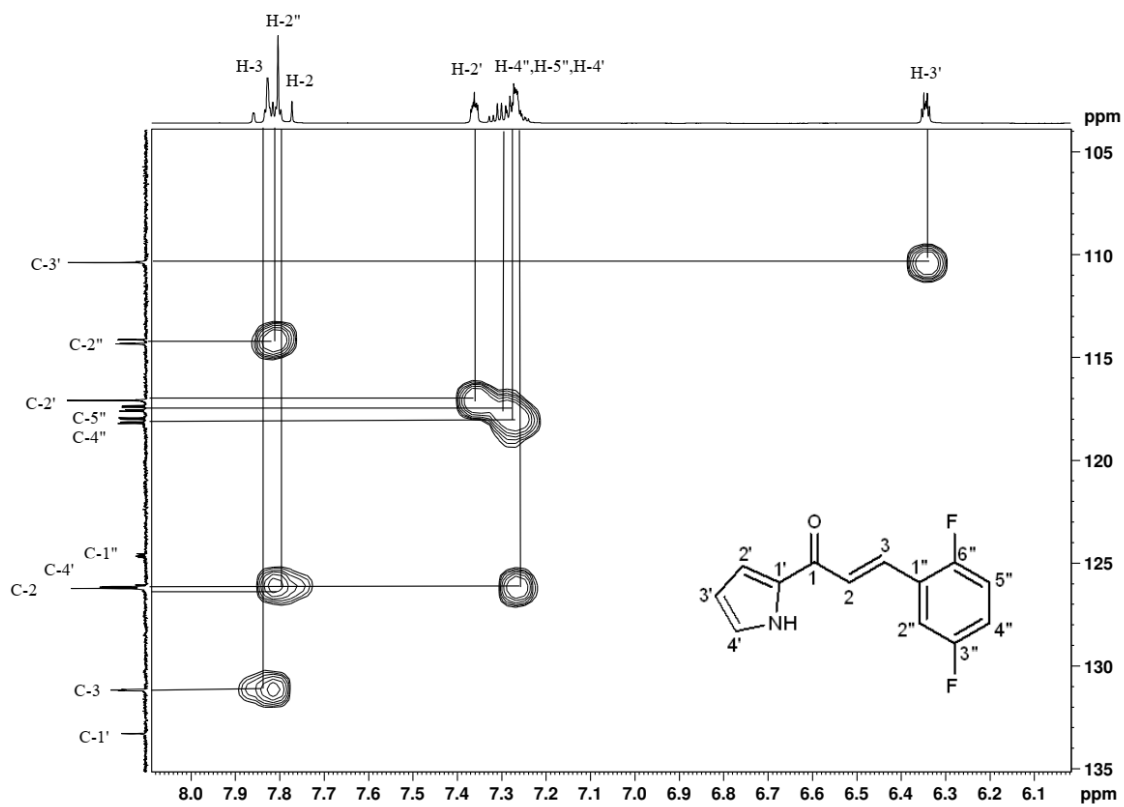

HSQC

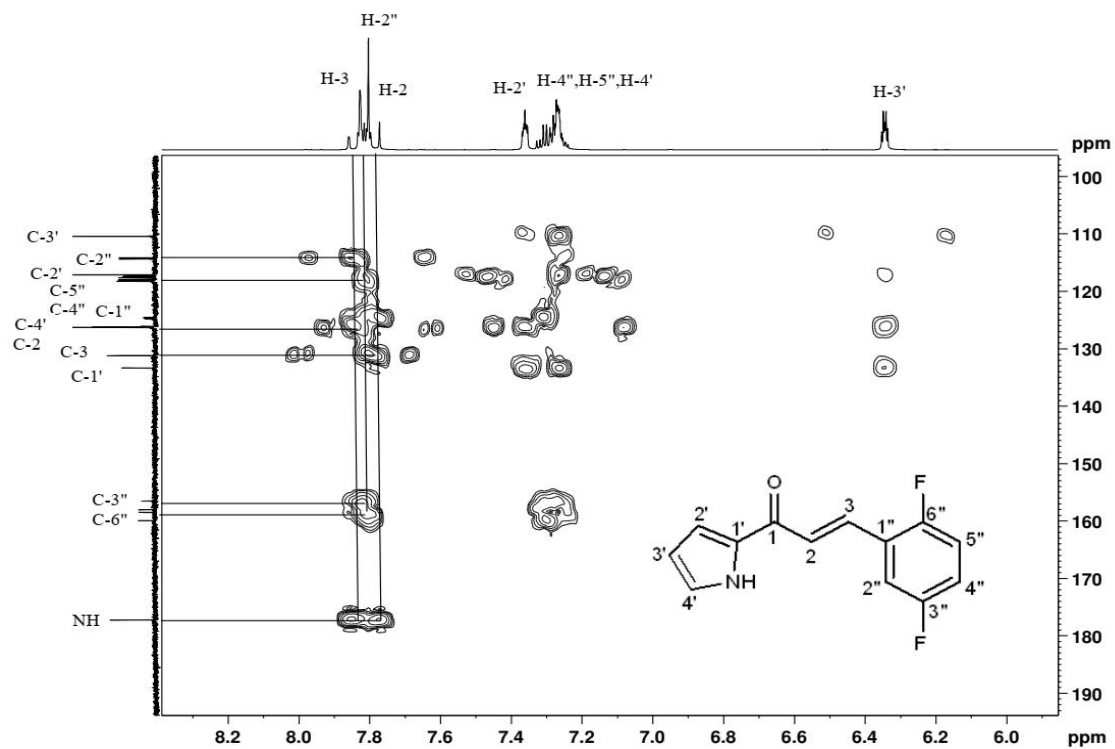

HMBC

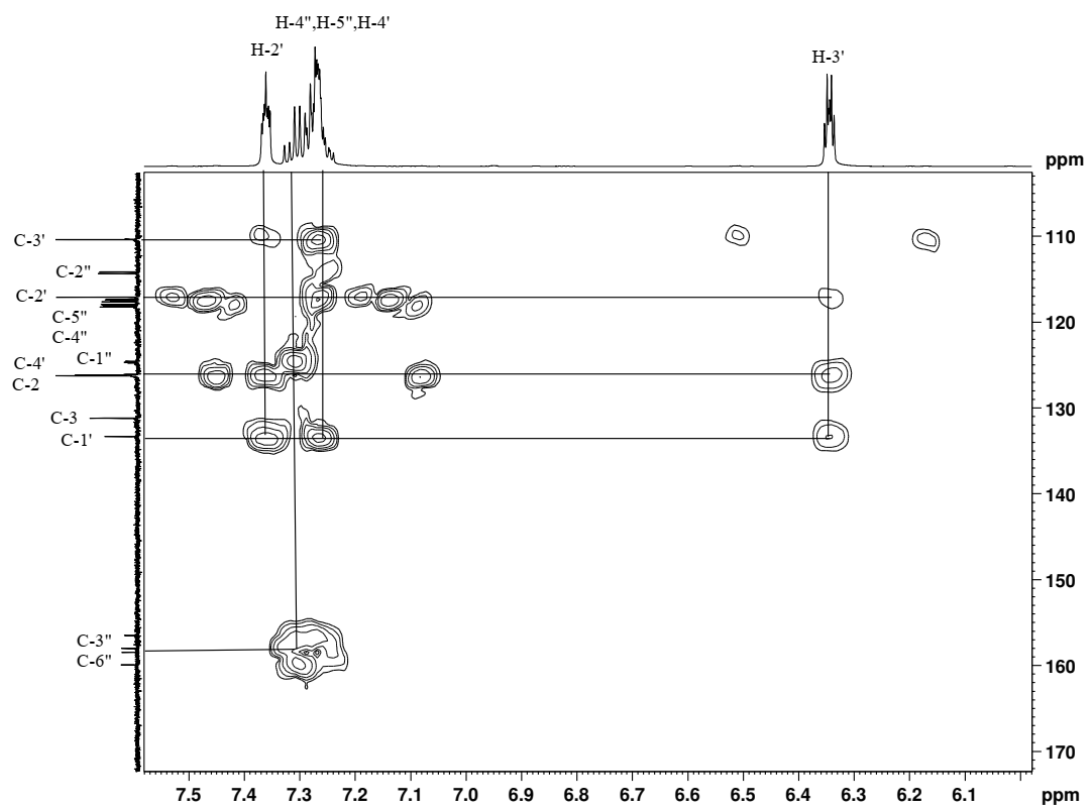

HMBC (expansion)

*3-(3, 4-Difluorophenyl)-1-(1H-pyrrol-2-yl) prop-2-en-1-one (14)*

Direct\_PC14\_FullIMS\_Neg #1 RT: 0.00 AV: 1 SM: 15G NL: 1.57E8  
T: FTMS - p ESI Full ms [60.0000-500.0000]

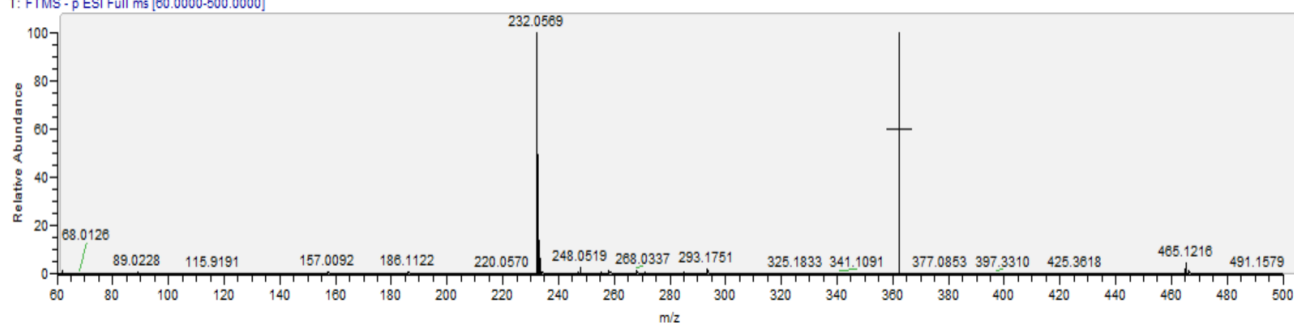

**HRMS (ESI) [M-H]<sup>-</sup> : found: 232.0569**

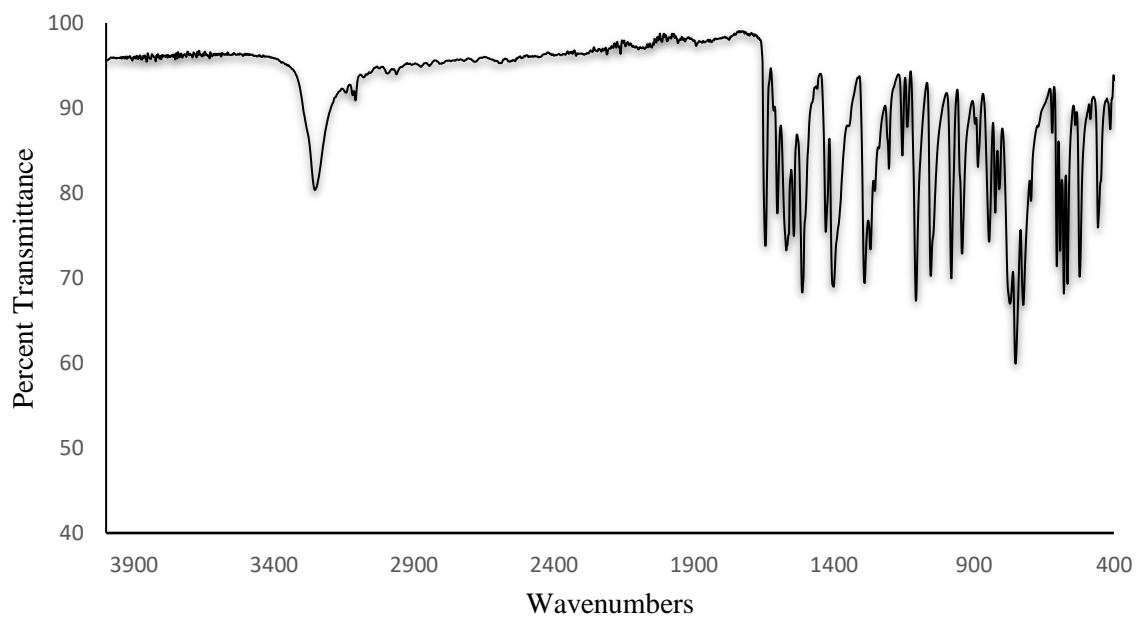

**FT-IR**

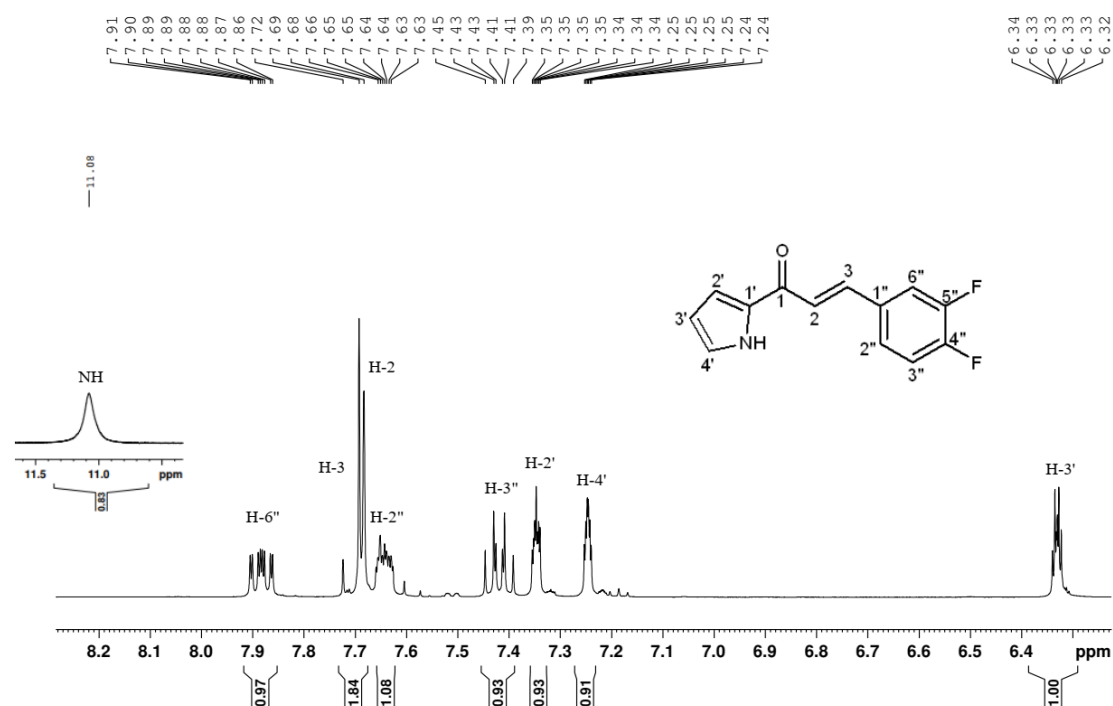

<sup>1</sup>H NMR (500 MHz, acetone-d<sub>6</sub>)  $\delta$ : 6.33 (*m*, 1H, Py-H), 7.24 (*m*, 1H, Py-H), 7.34 (*m*, 1H, Py-H), 7.42 (*m*, 1H, Ar-H), 7.64 (*m*, 1H, Ar-H), 7.66 (*d*,  $J=16.1$ , 1H, CH=CH), 7.70 (*d*,  $J=15.7$ , 1H, CH=CH), 7.88 (*m*, 1H, Ar-H), 11.08 (*br. s*, 1H, NH)

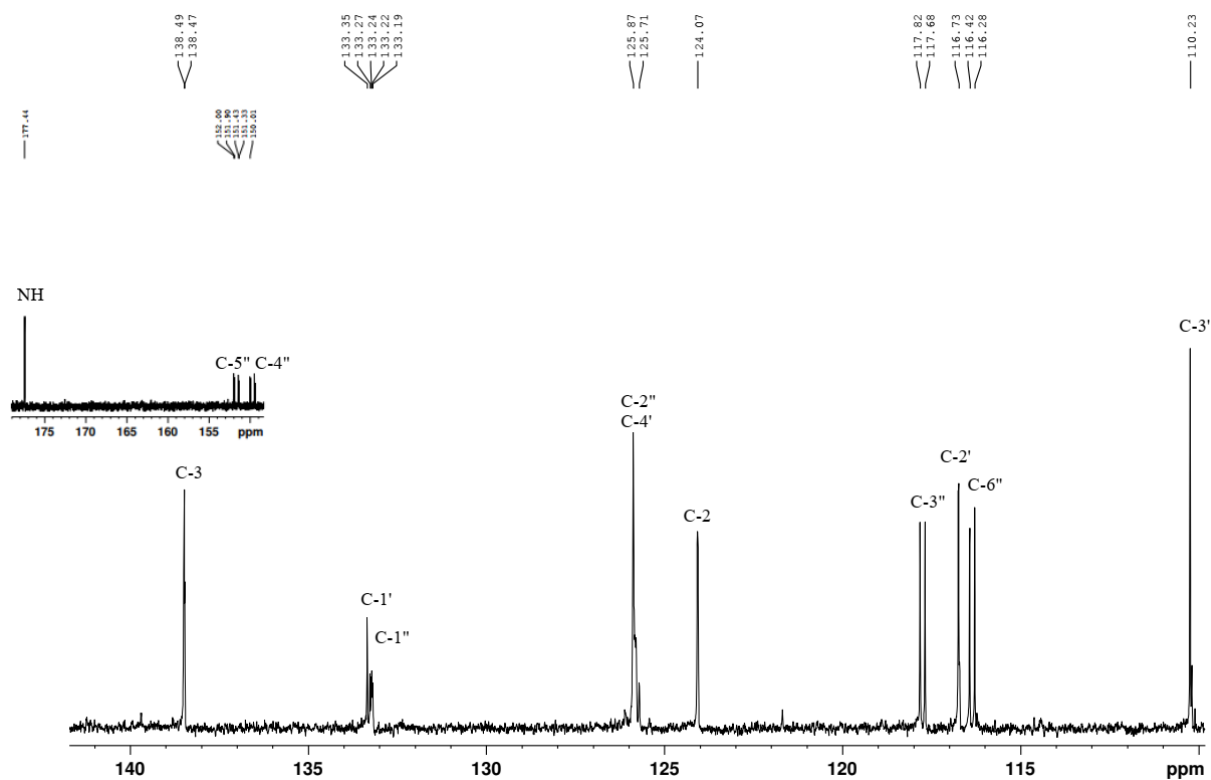

<sup>13</sup>C NMR (125 MHz, acetone-d<sub>6</sub>)  $\delta$ : 110.2, 116.3, 116.8, 117.7, 124.0, 125.7, 125.8, 133.2, 133.3, 138.4, 149.7, 151.7, 177.4

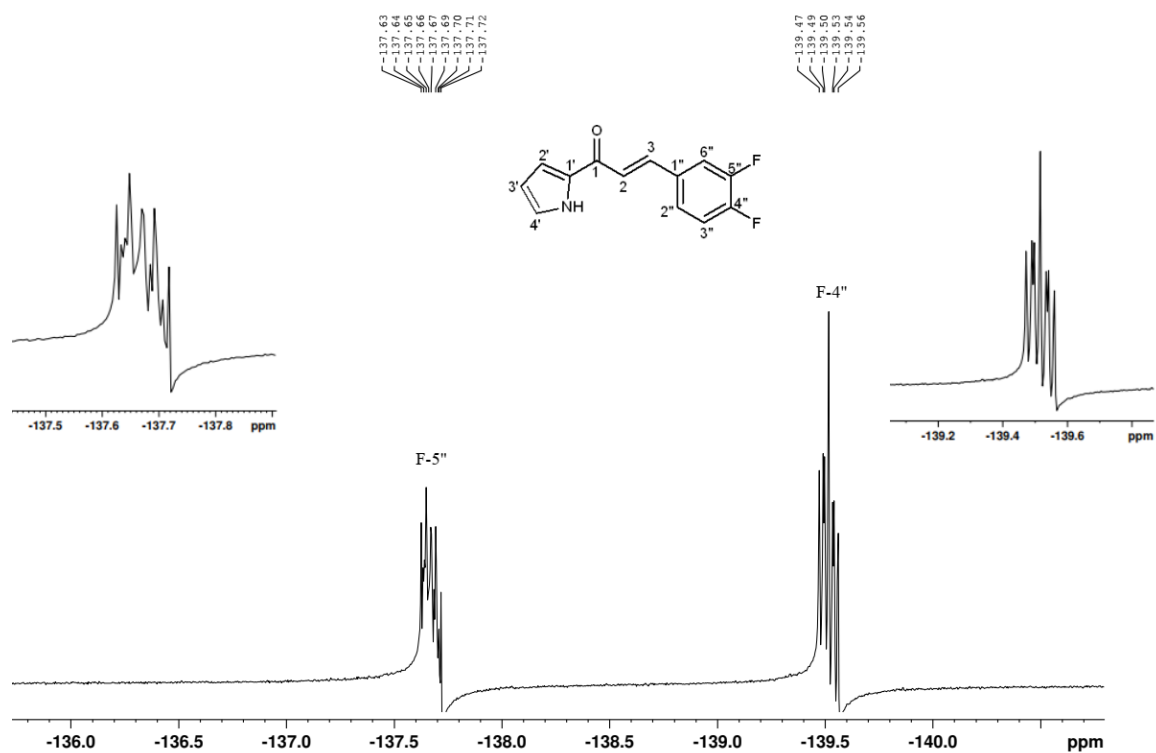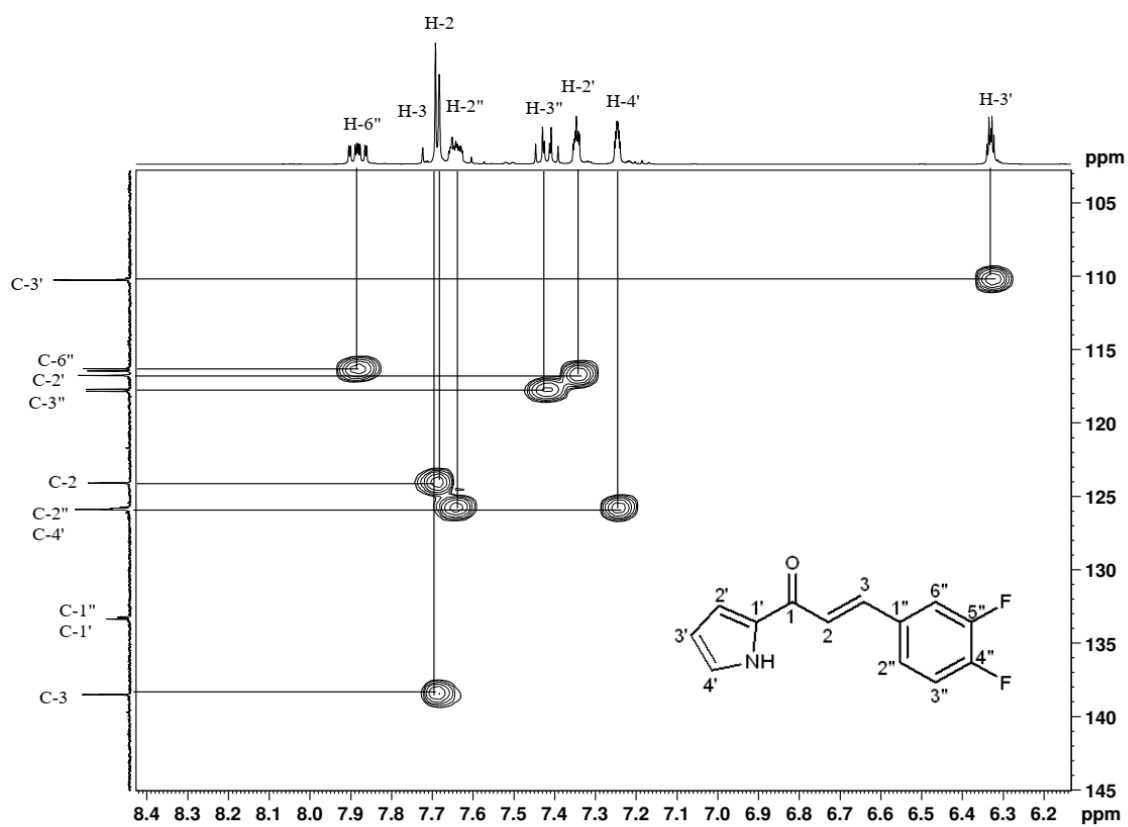

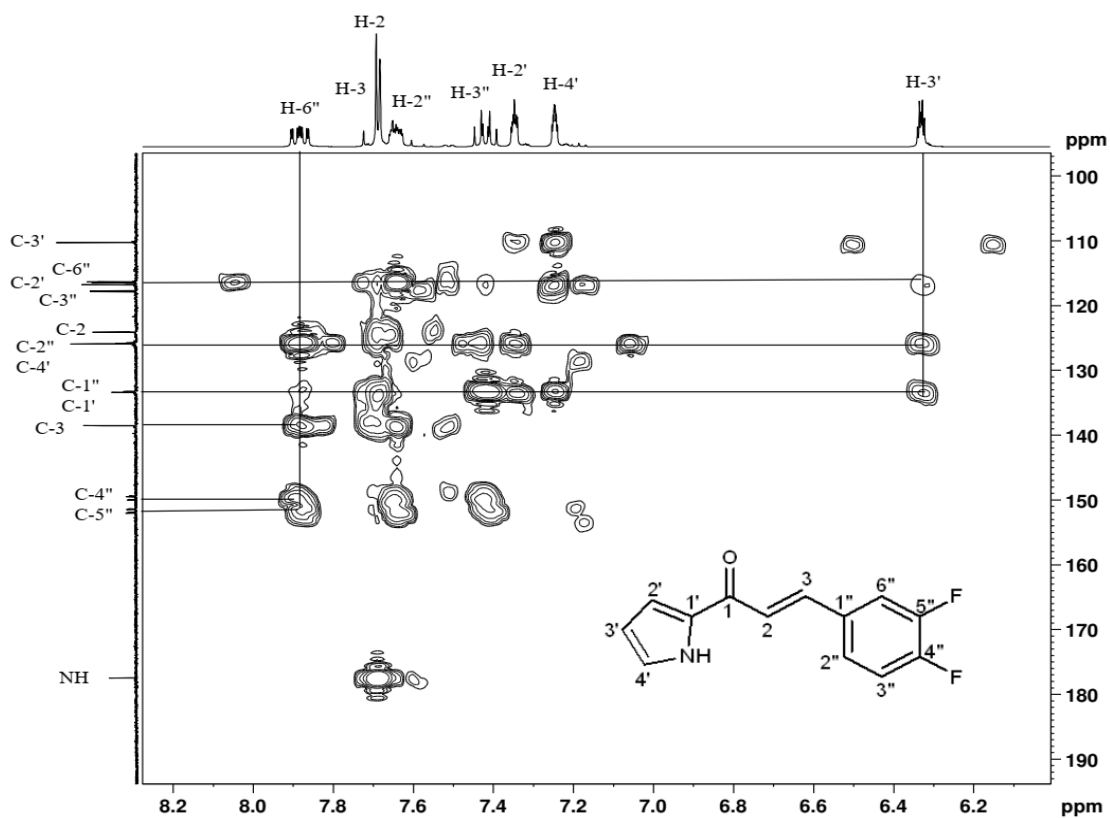

HMBC

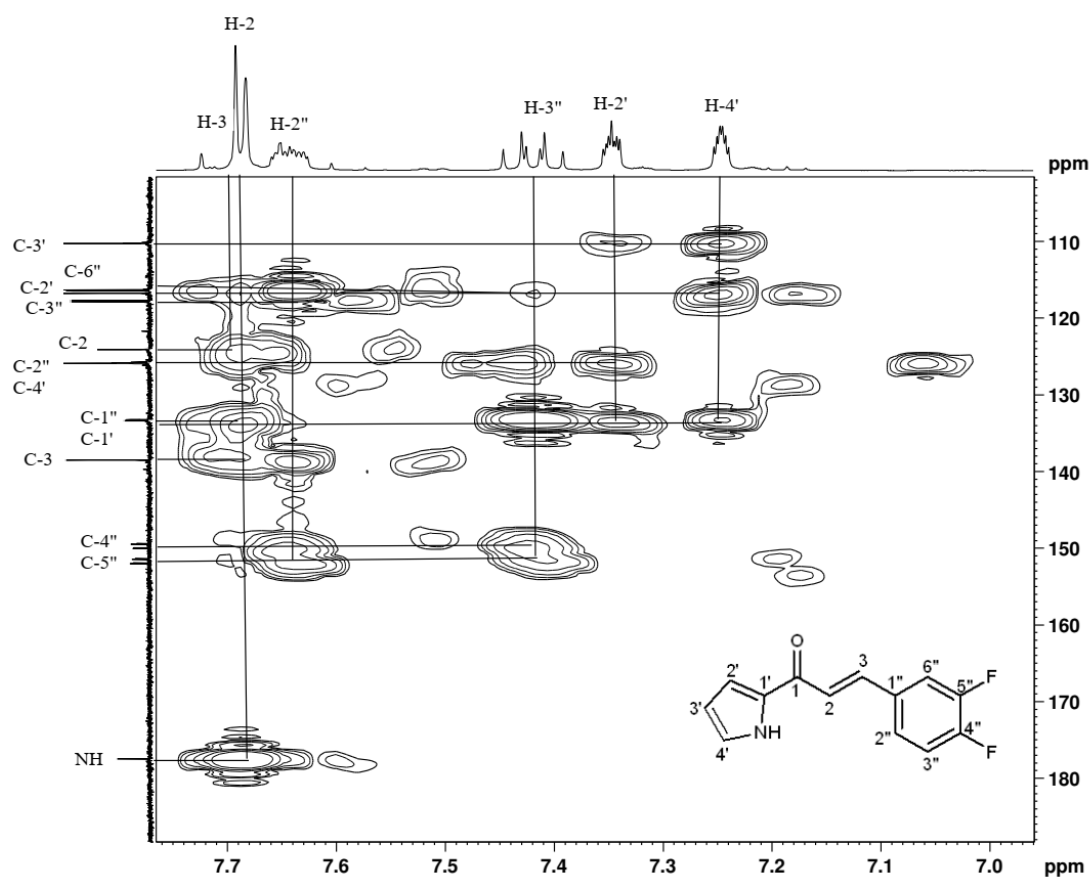

HMBC (expansion)

*3-(3, 5-Difluorophenyl)-1-(1H-pyrrol-2-yl) prop-2-en-1-one (15)*

Direct\_PC15\_FullIMS\_Neg #1 RT: 0.00 AV: 1 SM: 15G NL: 2.64E8  
T: FTMS - p ESI Full ms [60.0000-500.0000]

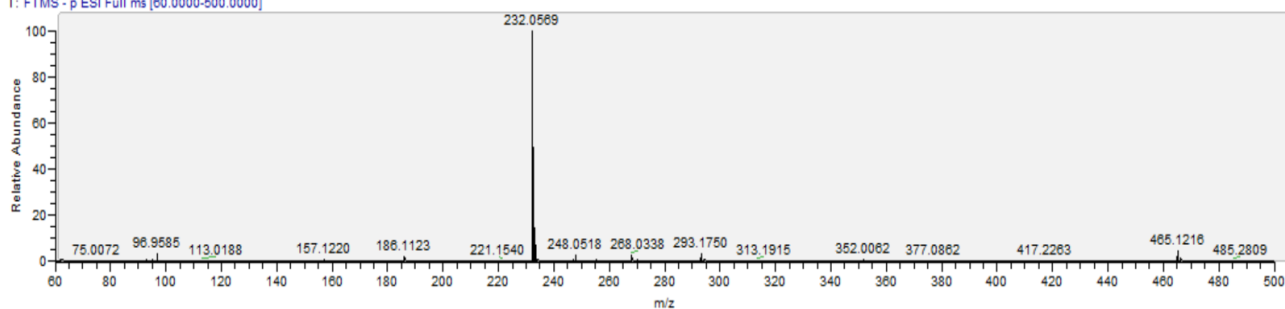

HRMS (ESI) [M-H]<sup>-</sup> : found: 232.0569

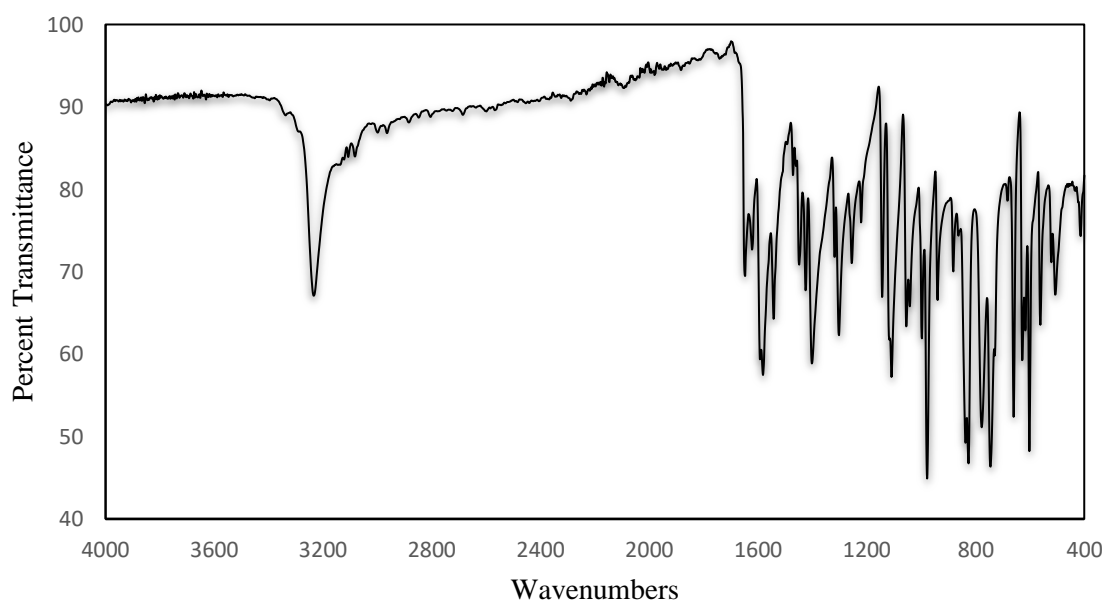

FT-IR

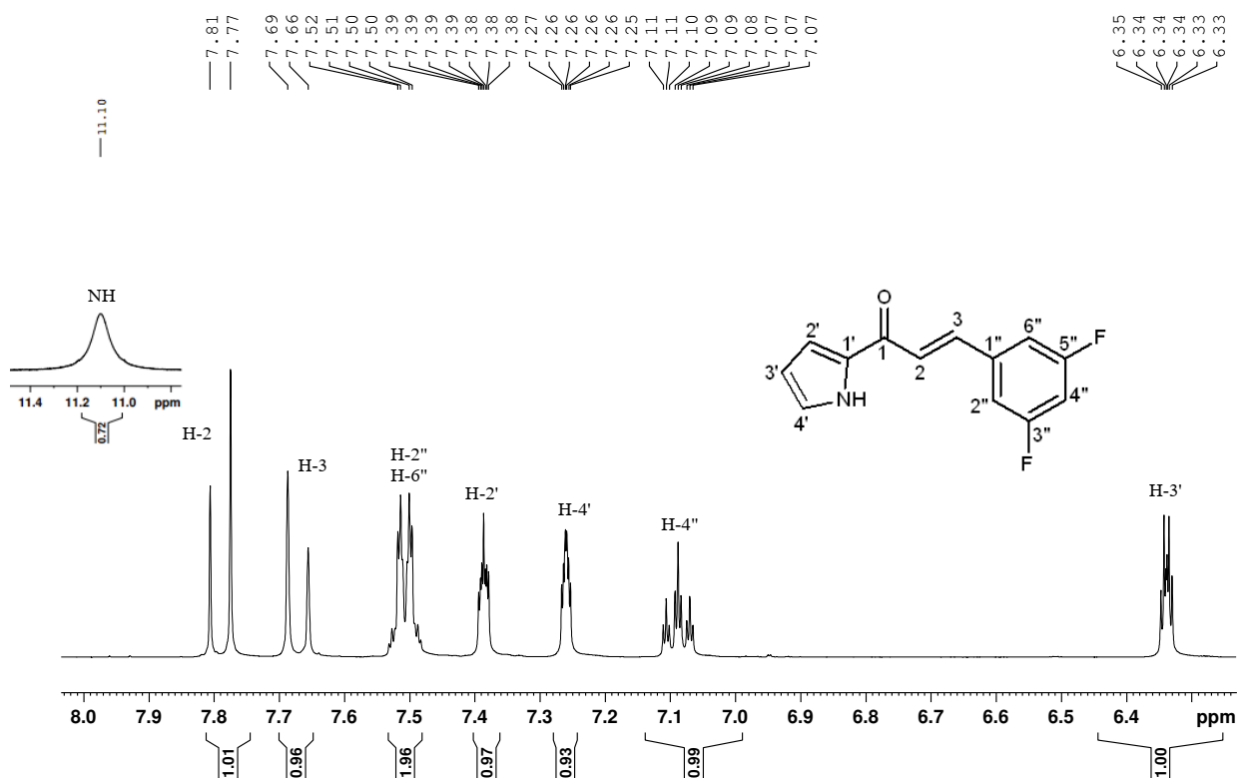

<sup>1</sup>H NMR (500 MHz, acetone-d<sub>6</sub>) δ: 6.34 (*m*, 1H, Py-H), 7.09 (*tt*, *J*=2.3 & 9.1 Hz 1H, Ar-H), 7.26 (*m*, 1H, Py-H), 7.39 (*m*, 1H, Py-H), 7.50 (*br. d*, *J*=2.1, 1H, Ar-H), 7.52 (*br d*, *J*=2.1, 1H, Ar-H), 7.67 (*d*, *J*=15.7, 1H, CH=CH), 7.79 (*d*, *J*=15.7, 1H, CH=CH), 11.10 (*br. s*, 1H, NH)

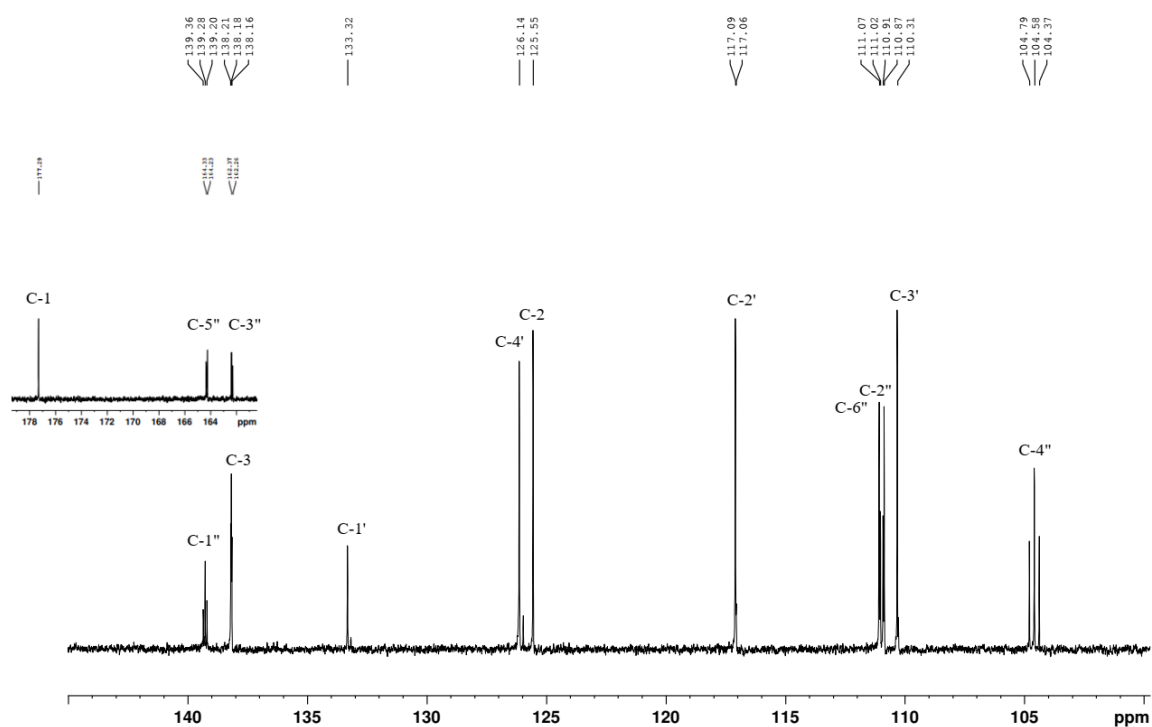

<sup>13</sup>C NMR (125 MHz, acetone-d<sub>6</sub>) δ: 104.5, 110.3, 110.9, 111.1, 117.0, 125.5, 126.1, 133.3, 138.1, 139.3, 162.3, 164.3, 177.3



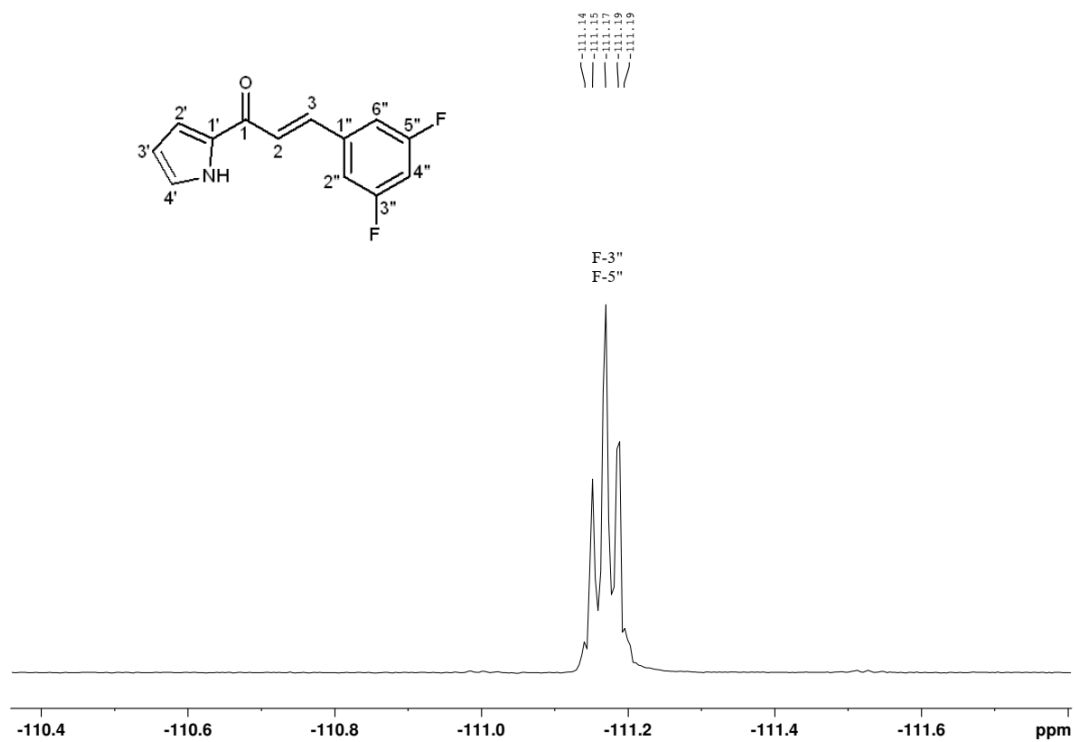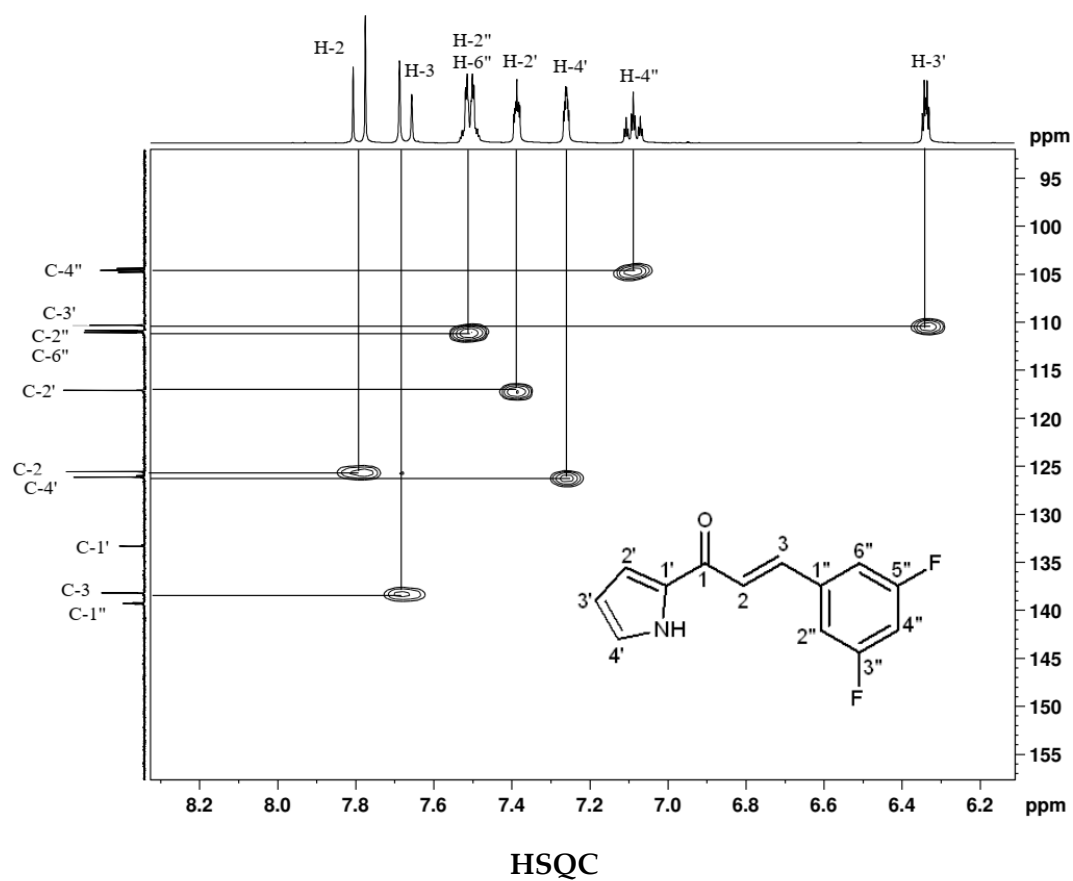

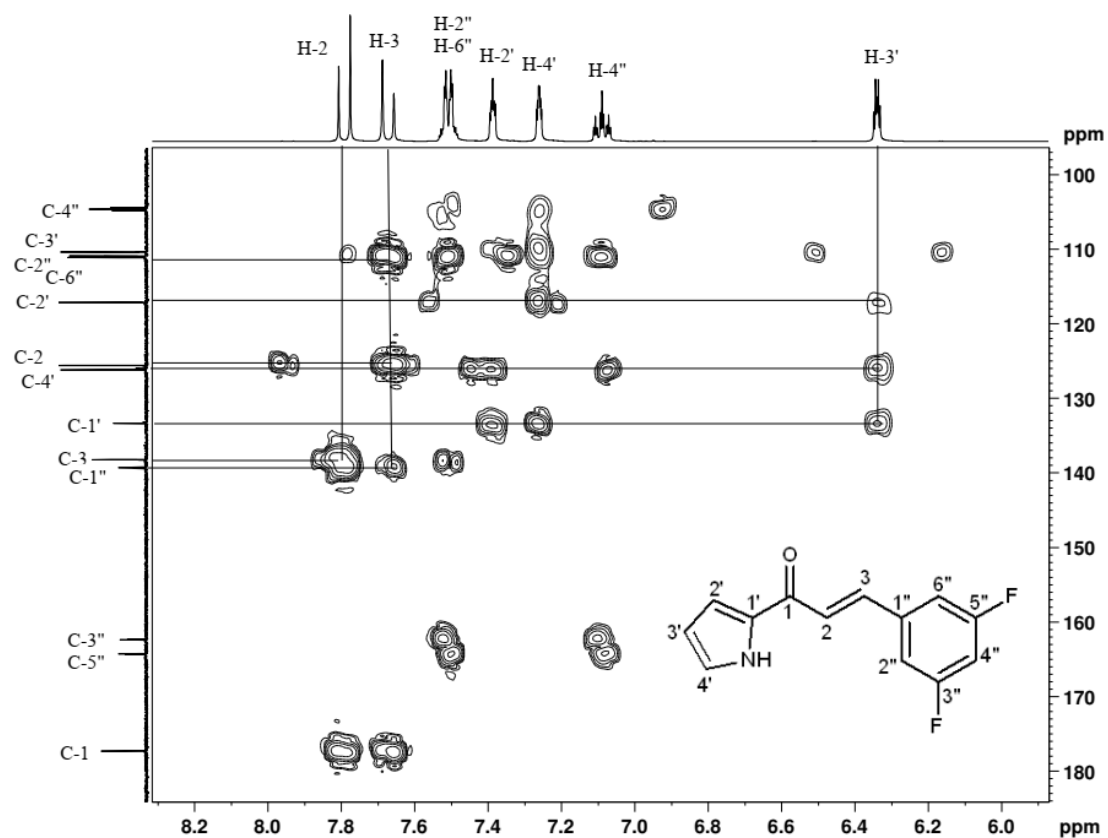

HMBC

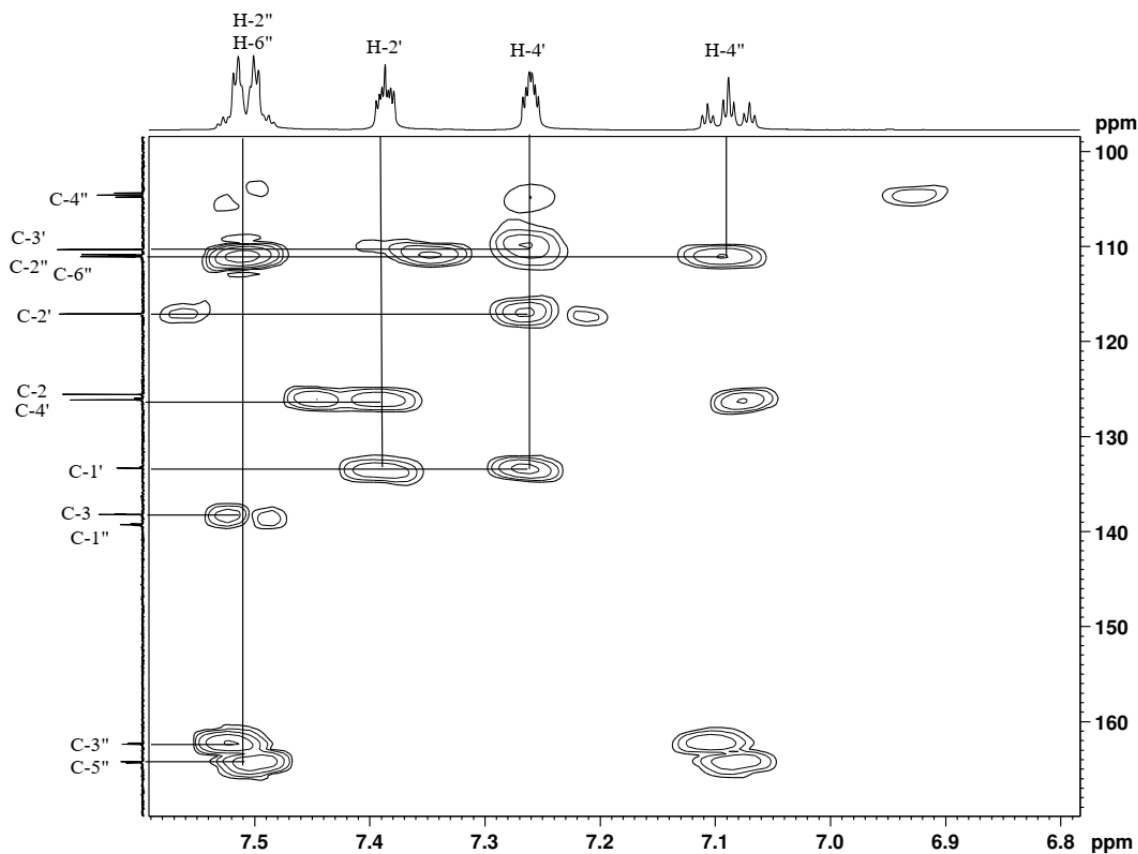

HMBC (expansion)

**Table S1.** Spectrometric and general data of pyrrolylated-chalcone analogues (1-15)

| Compound                                                                                       | <sup>1</sup> H NMR, <sup>13</sup> C NMR, <sup>19</sup> F NMR                                                                                                                                                                                                                                                                                                                                                                                                                                                                                                                                                                            | Mass found, [M] <sup>+</sup> (g/mol) | Yield (%) | Colour      | MP (°C) |
|------------------------------------------------------------------------------------------------|-----------------------------------------------------------------------------------------------------------------------------------------------------------------------------------------------------------------------------------------------------------------------------------------------------------------------------------------------------------------------------------------------------------------------------------------------------------------------------------------------------------------------------------------------------------------------------------------------------------------------------------------|--------------------------------------|-----------|-------------|---------|
| <b>1</b><br>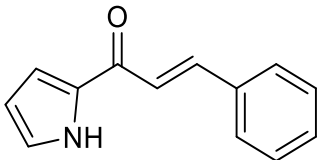  | <sup>1</sup> H NMR (700 MHz, acetone-d <sub>6</sub> ) δ: 6.32 ( <i>m</i> , 1H, Py-H), 7.23 ( <i>m</i> , 1H, Py-H), 7.32 ( <i>m</i> , 1H, Py-H), 7.47-7.43 ( <i>m</i> , 3H, Ar-H), 7.68 ( <i>d</i> , <i>J</i> =15.4 Hz, 1H, CH=CH), 7.74 ( <i>d</i> , <i>J</i> =16.1 Hz, 1H, CH=CH), 7.80 ( <i>m</i> , 2H, Ar-H), 11.06 ( <i>br. s</i> , 1H, NH)<br><br><sup>13</sup> C NMR (175 MHz, acetone-d <sub>6</sub> ) δ : 110.1, 116.3, 122.7, 125.5, 128.3, 128.8, 129.9, 133.4, 135.3, 140.8, 177.8                                                                                                                                           | 197.05                               | 13.28     | Brown       | 133-134 |
| <b>2</b><br>  | <sup>1</sup> H NMR (500 MHz, acetone-d <sub>6</sub> ) δ : 6.33 ( <i>m</i> , 1H, Py-H), 7.27 ( <i>m</i> , 4H, Py-H and Ar-H), 7.50 ( <i>m</i> , 1H, Ar-H), 7.73 ( <i>d</i> , <i>J</i> =15 Hz, 1H, CH=CH), 7.90 ( <i>d</i> , <i>J</i> =15 Hz, 1H, CH=CH), 7.98 ( <i>td</i> , 1H, Ar-H), 11.11 ( <i>br. s</i> , 1H, NH)<br><br><sup>13</sup> C NMR (125 MHz, acetone-d <sub>6</sub> ) δ : 110.3, 115.9, 116.6, 123.1, 124.7, 124.9, 125.9, 128.8, 131.8, 132.5, 133.3, 161.3, 177.5<br><br><sup>19</sup> F NMR (470 MHz, acetone-d <sub>6</sub> ) δ : -117.5                                                                               | 215.05                               | 95.41     | Pale brown  | 140-141 |
| <b>3</b><br> | <sup>1</sup> H NMR (500 MHz, acetone-d <sub>6</sub> ) δ : 6.34 ( <i>m</i> , 1H, Py-H), 7.20 ( <i>td</i> , 1H, Ar-H), 7.25 ( <i>m</i> , 1H, Py-H), 7.36 ( <i>m</i> , 1H, Py-H), 7.50 ( <i>m</i> , 1H, Ar-H), 7.61 ( <i>d</i> , 1H, Ar-H), 7.64 ( <i>m</i> , 1H, Ar-H), 7.71 ( <i>d</i> , <i>J</i> =15 Hz, 1H, CH=CH), 7.75 ( <i>d</i> , <i>J</i> =15 Hz, 1H, CH=CH), 11.08 ( <i>br. s</i> , 1H, NH)<br><br><sup>13</sup> C NMR (125 MHz, acetone-d <sub>6</sub> ) δ : 110.2, 114.0, 116.4, 116.7, 124.2, 124.7, 125.8, 130.7, 133.3, 137.9, 139.4, 163.1, 177.5<br><br><sup>19</sup> F NMR (470 MHz, acetone-d <sub>6</sub> ) δ: -114.5; | 215.05                               | 18.00     | Pale yellow | 138-139 |
| <b>4</b>                                                                                       | <sup>1</sup> H NMR (500 MHz, chloroform-d) δ: 6.36 ( <i>m</i> , 1H, Py-H), 7.07 ( <i>m</i> , 1H, Py-H), 7.10 ( <i>br. d</i> , <i>J</i> =9.0 Hz, 2H, Ar-H), 7.12 ( <i>m</i> , 1H, Py-H), 7.28                                                                                                                                                                                                                                                                                                                                                                                                                                            | 215.10                               | 2.29      | Pale yellow | 137-38  |

|   |                                                                                    |                                                                                                                                                                                                                                                                                                                                                                                                                                                                                                                                                                                                                                     |       |       |        |         |
|---|------------------------------------------------------------------------------------|-------------------------------------------------------------------------------------------------------------------------------------------------------------------------------------------------------------------------------------------------------------------------------------------------------------------------------------------------------------------------------------------------------------------------------------------------------------------------------------------------------------------------------------------------------------------------------------------------------------------------------------|-------|-------|--------|---------|
|   | 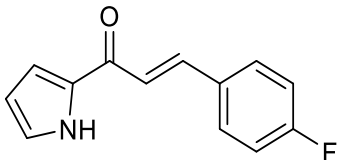  | <p>(<i>d</i>, <i>J</i>=15 Hz, 1H, CH=CH), 7.63 (<i>dd</i>, <i>J</i>=14.5 Hz, 2H, Ar-H), 7.79 (<i>d</i>, <i>J</i>=15 Hz, 1H, CH=CH), 11.11 (<i>br. s</i>, 1H, NH)</p> <p><b><sup>13</sup>C NMR</b> (125 MHz, chloroform-<i>d</i>) δ : 111.0, 116.1, 116.2, 121.6, 125.2, 130.1, 131.2, 133.1, 141.0, 163.9, 178.6</p> <p><b><sup>19</sup>F NMR</b> (470 MHz, acetone-<i>d</i><sub>6</sub>) δ: -109.6</p>                                                                                                                                                                                                                             |       |       |        |         |
| 5 |   | <p><b><sup>1</sup>H NMR</b> (700 MHz, DMSO-<i>d</i><sub>6</sub>) δ: 6.37 (<i>m</i>, 1H, Py-H), 7.37 (1H, Py-H), 7.42 (<i>td</i>, <i>J</i>=14.0 Hz, 1H, Ar-H), 7.64 (<i>s</i>, 1H, Py-H), 7.77 (<i>td</i>, <i>J</i>=14.0 Hz, 1H, Ar-H), 8.00 (<i>d</i>, <i>J</i>=7.0 Hz, 1H, Ar-H), 8.63 (<i>d</i>, <i>J</i>=8.4 Hz, 1H, Ar-H), 10.0 (<i>s</i>, 1H, NH), 12.33 (<i>br. s</i>, 2H, CH=CH)</p> <p><b><sup>13</sup>C NMR</b> (175 MHz, DMSO-<i>d</i><sub>6</sub>) δ: 112.2, 120.0, 123.7, 124.9, 128.6, 130.2, 136.2, 136.6, 138.6, 161.2, 173.5, 196.5</p>                                                                             | 242.0 | 2.90  | Grey   | 193-194 |
| 6 |   | <p><b><sup>1</sup>H NMR</b> (700 MHz, DMSO-<i>d</i><sub>6</sub>) δ: 6.30 (<i>m</i>, 1H, Py-H), 7.21 (<i>br. s</i>, 1H, Py-H), 7.45 (<i>br. s</i>, 1H, Py-H), 7.73 (<i>d</i>, <i>J</i>=15.4 Hz, 1H, CH=CH), 7.73 (<i>br. dd</i>, <i>J</i>=14 Hz, 1H, Ar-H), 7.88 (<i>d</i>, <i>J</i>=16 Hz, 1H, CH=CH), 8.24 (<i>d</i>, <i>J</i>=10.5 Hz, 1H, Ar-H), 8.27 (<i>d</i>, <i>J</i>=7.7 Hz, 1H, Ar-H), 8.67 (<i>br. s</i>, 1H, Ar-H), 12.00 (<i>br. s</i>, 1H, NH)</p> <p><b><sup>13</sup>C NMR</b> (175 MHz, DMSO-<i>d</i><sub>6</sub>) δ : 110.9, 118.7, 123.1, 124.7, 126.1, 127.6, 130.8, 133.3, 135.1, 137.1, 138.8, 148.8, 177.8</p> | 242.0 | 21.71 | Yellow | 174-175 |
| 7 |  | <p><b><sup>1</sup>H NMR</b> (700 MHz, DMSO-<i>d</i><sub>6</sub>) δ: 6.30 (<i>m</i>, 1H, Py-H), 7.21 (1H, Py-H), 7.3 (1H, Py-H), 7.72 (<i>d</i>, <i>J</i>=15.4 Hz, 1H, CH=CH), 7.87 (<i>d</i>, <i>J</i>=15.4 Hz, 1H, CH=CH), 8.10 (<i>d</i>, <i>J</i>=8.4 Hz, 2H, Ar-H), 8.26 (<i>d</i>, <i>J</i>=9.1 Hz, 2H, Ar-H), 12.04 (<i>br. s</i>, 1H, NH)</p> <p><b><sup>13</sup>C NMR</b> (175 MHz, DMSO-<i>d</i><sub>6</sub>) δ : 110.9, 118.7, 124.4, 127.5, 127.7, 129.9, 133.3, 138.5, 141.8, 148.2, 177.6</p>                                                                                                                          | 242.0 | 48.70 | Yellow | 184-185 |

|    |                                                                                     |                                                                                                                                                                                                                                                                                                                                                                                                                                                                                            |        |       |                 |         |
|----|-------------------------------------------------------------------------------------|--------------------------------------------------------------------------------------------------------------------------------------------------------------------------------------------------------------------------------------------------------------------------------------------------------------------------------------------------------------------------------------------------------------------------------------------------------------------------------------------|--------|-------|-----------------|---------|
| 8  | 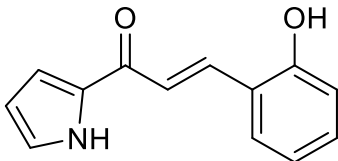   | <b><sup>1</sup>H NMR</b> (700 MHz, acetone- <i>d</i> <sub>6</sub> ) δ : 6.17 ( <i>m</i> , 1H, Py-H), 6.77 ( <i>t</i> , <i>J</i> =14.0, 1H, Ar-H), 6.85 ( <i>d</i> , <i>J</i> =8.4, 1H, Ar-H), 7.06 ( <i>m</i> , 1H, Py-H), 7.08 ( <i>m</i> , 1H, Py-H), 7.11 ( <i>t</i> , <i>J</i> =16.8, 1H, Ar-H), 7.54 ( <i>d</i> , <i>J</i> =15.4, 1H, CH=CH), 7.64 ( <i>d</i> , <i>J</i> =9.8, 1H, Ar-H), 7.99 ( <i>d</i> , <i>J</i> =15.4, 1H, CH=CH), 8.96 (1H, OH), 10.87 ( <i>br. s</i> , 1H, NH) | 213.05 | 10.83 | Yellowish brown | 151-152 |
|    |                                                                                     | <b><sup>13</sup>C NMR</b> (175 MHz, acetone- <i>d</i> <sub>6</sub> ) δ : 110.0, 115.7, 116.1, 119.9, 122.2, 125.1, 128.5, 131.1, 133.6, 136.4, 156.7, 178.4                                                                                                                                                                                                                                                                                                                                |        |       |                 |         |
| 9  |    | <b><sup>1</sup>H NMR</b> (700 MHz, acetone- <i>d</i> <sub>6</sub> ) δ : 6.33 ( <i>m</i> , 1H, Py-H), 6.93 ( <i>td</i> , <i>J</i> =10.0, 1H, Ar-H), 7.23 ( <i>m</i> , 1H, Py-H), 7.24 ( <i>m</i> , 1H, Ar-H), 7.27 ( <i>m</i> , 1H, Ar-H), 7.29 ( <i>s</i> , 1H, Ar-H), 7.31 ( <i>m</i> , 1H, Py-H), 7.60 ( <i>d</i> , <i>J</i> =15.0 Hz, 1H, CH=CH), 7.68 ( <i>d</i> , <i>J</i> =15.0 Hz, 1H, CH=CH), 8.66 (1H, OH), 11.08 ( <i>br. s</i> , 1H, NH)                                        | 213.05 | 5.09  | Yellow          | 150-151 |
|    |                                                                                     | <b><sup>13</sup>C NMR</b> (175 MHz, acetone- <i>d</i> <sub>6</sub> ) δ : 110.1, 114.7, 116.3, 117.1, 119.7, 122.6, 125.5, 129.8, 133.4, 136.7, 141.1, 157.8, 177.9                                                                                                                                                                                                                                                                                                                         |        |       |                 |         |
| 10 |    | <b><sup>1</sup>H NMR</b> (700 MHz, acetone- <i>d</i> <sub>6</sub> ) δ : 6.30 ( <i>m</i> , 1H, Py-H), 6.92 ( <i>dd</i> , 2H, Ar-H), 7.20 ( <i>m</i> , 1H, Py-H), 7.26 ( <i>m</i> , 1H, Py-H), 7.50 ( <i>d</i> , <i>J</i> =15.4, 1H, CH=CH), 7.68 ( <i>d</i> , 2H, Ar-H), 7.69 ( <i>d</i> , <i>J</i> =15.6, CH=CH), 8.95 (1H, OH), 11.00( <i>br. s</i> , 1H, NH)                                                                                                                             | 213.0  | 12.85 | Yellow          | 151-152 |
|    |                                                                                     | <b><sup>13</sup>C NMR</b> (175 MHz, acetone- <i>d</i> <sub>6</sub> ) δ: 109.9, 115.6, 115.7, 119.5, 125.0, 126.9, 130.2, 133.5, 141.1, 159.5, 178.                                                                                                                                                                                                                                                                                                                                         |        |       |                 |         |
| 11 |  | <b><sup>1</sup>H NMR</b> (500 MHz, acetone- <i>d</i> <sub>6</sub> ) δ : 6.34 ( <i>m</i> , 1H, Py-H), 7.27 ( <i>m</i> , 1H, Py-H), 7.30 ( <i>m</i> , 1H, Ar-H), 7.32 ( <i>m</i> , 1H, Py-H), 7.40 ( <i>m</i> , 1H, Ar-H), 7.75 ( <i>d</i> , <i>J</i> =16.0, 1H, CH=CH), 7.78 ( <i>dd</i> , <i>J</i> =9.0, 1H, Ar-H), 7.85 ( <i>d</i> , <i>J</i> =16.0, 1H, CH=CH), 11.15 ( <i>br. s</i> , 1H, NH)                                                                                           | 233.0  | 65.37 | Yellow          | 142-143 |
|    |                                                                                     | <b><sup>13</sup>C NMR</b> (125 MHz, acetone- <i>d</i> <sub>6</sub> ) δ : 110.3, 116.9, 118.2, 123.8, 124.8, 125.4, 126.2, 131.2, 133.2, 148.9, 150.7, 177.2                                                                                                                                                                                                                                                                                                                                |        |       |                 |         |
|    |                                                                                     | <b><sup>19</sup>F NMR</b> (470 MHz, acetone- <i>d</i> <sub>6</sub> ) δ: -140.2 & -143.6                                                                                                                                                                                                                                                                                                                                                                                                    |        |       |                 |         |

|    |                                                                                     |                                                                                                                                                                                                                                                                                                                                                                                                                                                                                                                                                                                                                   |       |       |            |         |
|----|-------------------------------------------------------------------------------------|-------------------------------------------------------------------------------------------------------------------------------------------------------------------------------------------------------------------------------------------------------------------------------------------------------------------------------------------------------------------------------------------------------------------------------------------------------------------------------------------------------------------------------------------------------------------------------------------------------------------|-------|-------|------------|---------|
| 12 | 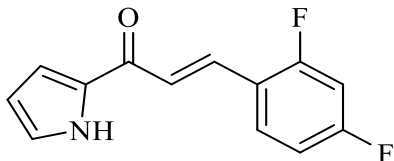   | <p><b><sup>1</sup>H NMR</b> (500 MHz, acetone-d<sub>6</sub>) δ : 6.33 (<i>br. s</i>, 1H, Py-H), 7.15 (<i>m</i>, 2H, Ar-H), 7.29 (<i>br. s</i>, 2H, Py-H), 7.70 (<i>d</i>, <i>J</i>=16.0, 1H, CH=CH), 7.80 (<i>d</i>, <i>J</i>=16.0, 1H, CH=CH), 8.06 (<i>m</i>, 1H, Ar-H), 11.12 (<i>br. s</i>, 1H, NH)</p> <p><b><sup>13</sup>C NMR</b> (125 MHz, acetone-d<sub>6</sub>) δ : 104.2, 110.3, 112.1, 116.7, 119.8, 124.6, 125.9, 130.3, 131.5, 133.2, 160.6 &amp; 162.6, 164.8 &amp; 162.8, 177.4</p> <p><b><sup>19</sup>F NMR</b> (470 MHz, acetone-d<sub>6</sub>) δ: -108.3 &amp; -112.9</p>                      | 233.0 | 90.23 | Pale white | 118-119 |
| 13 |    | <p><b><sup>1</sup>H NMR</b> (500 MHz, acetone-d<sub>6</sub>) δ : 6.34 (<i>m</i>, 1H, Py-H), 7.28 (<i>m</i>, 1H, Py-H), 7.31 (<i>dd</i>, <i>J</i>=14.0, 2H, Ar-H), 7.36 (<i>m</i>, 1H, Py-H), 7.78 (<i>d</i>, <i>J</i>=16.0, 1H, CH=CH), 7.81 (<i>m</i>, 1H, Py-H), 7.84 (<i>d</i>, <i>J</i>=16.0, 1H, CH=CH), 11.14 (<i>br. s</i>, 1H, NH)</p> <p><b><sup>13</sup>C NMR</b> (125 MHz, acetone-d<sub>6</sub>) δ : 110.3, 114.2, 117.0, 117.5, 118.1, 124.6, 126.1, 126.2, 131.1, 133.2, 157.2, 159.2, 177.2</p> <p><b><sup>19</sup>F NMR</b> (470 MHz, acetone-d<sub>6</sub>) δ: -119.8 &amp; -123.4</p>           | 233.0 | 85.28 | Pale white | 129-125 |
| 14 |    | <p><b><sup>1</sup>H NMR</b> (500 MHz, acetone-d<sub>6</sub>) δ: 6.33 (<i>m</i>, 1H, Py-H), 7.24 (<i>m</i>, 1H, Py-H), 7.34 (<i>m</i>, 1H, Py-H), 7.42 (<i>m</i>, 1H, Ar-H), 7.64 (<i>m</i>, 1H, Ar-H), 7.66 (<i>d</i>, <i>J</i>=16.0, 1H, CH=CH), 7.70 (<i>d</i>, <i>J</i>=16.0, 1H, CH=CH), 7.88 (<i>m</i>, 1H, Ar-H), 11.08 (<i>br. s</i>, 1H, NH)</p> <p><b><sup>13</sup>C NMR</b> (125 MHz, acetone-d<sub>6</sub>) δ : 110.2, 116.3, 116.8, 117.7, 124.0, 125.7, 125.8, 133.2, 133.3, 138.4, 149.7, 151.7, 177.4</p> <p><b><sup>19</sup>F NMR</b> (470 MHz, acetone-d<sub>6</sub>) δ: -137.6 &amp; -139.5</p> | 233.0 | 47.51 | Yellow     | 152-153 |
| 15 |  | <p><b><sup>1</sup>H NMR</b> (500 MHz, acetone-d<sub>6</sub>) δ: 6.34 (<i>m</i>, 1H, Py-H), 7.09 (<i>tt</i>, 1H, Ar-H), 7.26 (<i>m</i>, 1H, Py-H), 7.39 (<i>m</i>, 1H, Py-H), 7.50 (<i>br. d</i>, <i>J</i>=2.0, 1H, Ar-H), 7.52 (<i>br. d</i>, <i>J</i>=2.0, 1H, Ar-H), 7.67 (<i>d</i>, <i>J</i>=15.5, 1H, CH=CH), 7.79 (<i>d</i>, <i>J</i>=15.5, 1H, CH=CH), 11.10 (<i>br. s</i>, 1H, NH)</p> <p><b><sup>13</sup>C NMR</b> (125 MHz, acetone-d<sub>6</sub>) δ : 104.5, 110.3, 110.9, 111.1, 117.0, 125.5, 126.1, 133.3, 138.1, 139.3, 162.3, 164.3, 177.3</p>                                                     | 233.0 | 69.72 | Yellow     | 151-152 |

---

**$^{19}\text{F}$  NMR** (470 MHz, acetone- $\text{d}_6$ )  $\delta$  : -111.1

---

2. *In silico* PAINS filtration, physicochemical and drug likeness properties of compounds 1-15 calculated via FAF-Drugs4.

### Filtering statistics

- **Input molecules:** 15
- **Duplicates:** 0
- **Mixtures:** 0
- **Large Compounds:** 0
- **Isotopes and Inorganics:** 0
- **Empty Structures:** 0
- **Filtered molecules:** 15
- **Rejected molecules:** 0
- **Accepted molecules:** 15
- **Intermediate molecules:** 0
- **PAINS (Pan Assays Interferences Compounds):** 0
- **Covalent Inhibitors:** 0

**Table S2.** The Lipinski rule values of pyrrolylated-chalcone analogues generated from FAF-Drugs4

|   | Structure                                                                           | MW<br>(g/mol) | Log P | HBD | HBA | RO5<br>violations |
|---|-------------------------------------------------------------------------------------|---------------|-------|-----|-----|-------------------|
| 1 | 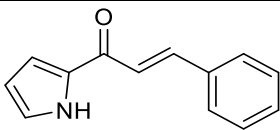 | 197.23        | 2.81  | 1   | 2   | 0                 |
| 2 |  | 205.23        | 3.12  | 1   | 2   | 0                 |
| 3 |  | 215.22        | 2.91  | 1   | 2   | 0                 |
| 4 |  | 215.22        | 2.91  | 1   | 2   | 0                 |
| 5 |  | 242.23        | 2.64  | 1   | 5   | 0                 |



|    |                                                                                     |        |      |   |   |   |
|----|-------------------------------------------------------------------------------------|--------|------|---|---|---|
| 6  | 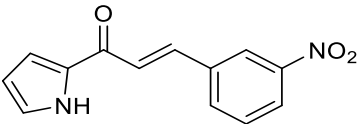   | 242.23 | 2.64 | 1 | 5 | 0 |
| 7  |    | 242.23 | 2.64 | 1 | 5 | 0 |
| 8  |    | 213.23 | 2.97 | 2 | 3 | 0 |
| 9  |    | 213.23 | 2.46 | 2 | 3 | 0 |
| 10 |    | 213.23 | 2.46 | 2 | 3 | 0 |
| 11 |   | 233.21 | 3.01 | 1 | 2 | 0 |
| 12 |  | 233.21 | 3.01 | 1 | 2 | 0 |
| 13 |  | 233.21 | 3.01 | 1 | 2 | 0 |
| 14 |  | 233.21 | 3.01 | 1 | 2 | 0 |
| 15 |  | 233.21 | 3.01 | 1 | 2 | 0 |
